# Supplementary material
Source: PubMed Central journal article supplement (PMC5777175)
Supplement: NIHMS923890-supplement-SI.pdf [file NIHMS923890-supplement-SI.pdf]

## Airborne PCBs and OH-PCBs inside and outside urban and rural U.S. schools Supporting Information

Rachel F. Marek<sup>1\*</sup>, Peter S. Thorne<sup>2\*</sup>, Nicholas J. Herkert<sup>1,3</sup>, Andrew M. Awad<sup>1</sup>, and Keri C. Hornbuckle<sup>1,3\*</sup>

1. IIHR-Hydroscience and Engineering  
The University of Iowa, Iowa City IA (USA) 52242
2. Dept. Occupational and Environmental Health  
The University of Iowa, Iowa City IA (USA) 52242
3. Dept. Civil and Environmental Engineering  
The University of Iowa, Iowa City IA (USA) 52242

Number of pages: 34

Number of tables: 13

Number of figures: 5

## Methods and Materials

### School characteristics

**Table S1** School characteristics and number of paired samples collected

| School <sup>a</sup> | Year built | Renovations/additions                                | Proximity to IHSC <sup>b</sup> | Indoor sampler location   | Air handling in indoor sampler room      | # in/out pairs <sup>c</sup> |
|---------------------|------------|------------------------------------------------------|--------------------------------|---------------------------|------------------------------------------|-----------------------------|
| EC School 1         | 1931       | replaced ceiling tiles and updated restrooms 2014    | 1.6                            | classroom                 |                                          | 5                           |
| EC School 2         | 1968       | front entrance renovated 2016                        | 2.5                            | library                   |                                          | 12                          |
| EC School 3         | 1986       | School wing and fitness center addition              | 0.4                            | bookstore                 |                                          | 12                          |
| EC School 4         | 1972       |                                                      | 0.6                            | library                   |                                          | 7*                          |
| CJ School 1         | 1961       | 2 classrooms added in 1984 and 6 rooms added in 1990 | N/A                            | hallway outside cafeteria | geothermal, Airedale units added in 2004 | 13                          |
| CJ School 2         | 1918       | Air conditioning added in 2006                       | N/A                            |                           | Radiant heat from boiler system          | 13                          |

<sup>a</sup> EC represents East Chicago and CJ represents Columbus Junction.

<sup>b</sup> units of km, N/A indicates not applicable.

<sup>c</sup> Asterisk (\*) indicates school where outdoor samplers were lost or stolen during three collection periods so outdoor n=4.

### Cleaning PUF

PUF were cleaned in Soxhlets over three days in separate Soxhlet units from those used for sample extraction. PUF were cycled for one day with hexane, one day with acetone, and one day with hexane/acetone (1:1 v/v). PUF were allowed to dry in a fume hood for 2 hours and then wrapped in aluminum foil, placed individually in plastic zippered bags, and held until field deployment in a 4 °C refrigerator used only for storing cleaned sample media.

## Extracting and analyzing PUF

**Table S2**  $^{13}\text{C}$ -labeled PCB and  $^{13}\text{C}$ -labeled OH-PCB surrogate standards (SS) spiked on PUF, by chlorine homolog<sup>a</sup>

| Cl homolog | $^{13}\text{C}_{12}$ PCB SS abbreviation | $^{13}\text{C}_{12}$ PCB SS full name       | $^{13}\text{C}_{12}$ OH-PCB SS abbreviation                    | $^{13}\text{C}_{12}$ OH-PCB SS full name                                                  |
|------------|------------------------------------------|---------------------------------------------|----------------------------------------------------------------|-------------------------------------------------------------------------------------------|
| mono       | $^{13}\text{C}$ PCB 3                    | 4-monochlorobiphenyl                        |                                                                |                                                                                           |
| di         | $^{13}\text{C}$ PCB 15                   | 4,4'-dichlorobiphenyl                       | $^{13}\text{C}$ 4'-OH PCB 12                                   | 3',4'-dichloro-4-biphenylol                                                               |
| tri        | $^{13}\text{C}$ PCB 28                   | 2,4,4'-trichlorobiphenyl                    | $^{13}\text{C}$ 4'-OH PCB 29                                   | 2',4',5'-trichloro-4-biphenylol                                                           |
| tetra      | $^{13}\text{C}$ PCB 52                   | 2,2',5,5'-tetrachlorobiphenyl               | $^{13}\text{C}$ 4'-OH PCB 61                                   | 2',3',4',5'-tetrachloro-4-biphenylol                                                      |
| penta      | $^{13}\text{C}$ PCB 118                  | 2,3',4,4',5-pentachlorobiphenyl             | $^{13}\text{C}$ 4'-OH PCB 120                                  | 2',3,4',5,5'-pentachloro-4-biphenylol                                                     |
| hexa       | $^{13}\text{C}$ PCB 153                  | 2,2',4,4',5,5'-hexachlorobiphenyl           | $^{13}\text{C}$ 4'-OH PCB 159                                  | 2',3,3',4',5,5'-hexachloro-4-biphenylol                                                   |
| hepta      | $^{13}\text{C}$ PCB 180                  | 2,2',3,4,4',5,5'-heptachlorobiphenyl        | $^{13}\text{C}$ 4'-OH PCB 172,<br>$^{13}\text{C}$ 4-OH PCB 187 | 2,2',3,3',4',5,5'-heptachloro-4-biphenylol,<br>2,2',3,4',5,5',6- heptachloro-4-biphenylol |
| octa       | $^{13}\text{C}$ PCB 194                  | 2,2',3,3',4,4',5,5'-octachlorobiphenyl      |                                                                |                                                                                           |
| nona       | $^{13}\text{C}$ PCB 208                  | 2,2',3,3',4,5,5',6,6'-nonachlorobiphenyl    |                                                                |                                                                                           |
| deca       | $^{13}\text{C}$ PCB 209                  | 2,2',3,3',4,4',5,5',6,6'-decachlorobiphenyl |                                                                |                                                                                           |

<sup>a</sup>Labeled PCB were from Cambridge Isotope Laboratories, Inc., Andover, MA, USA.  $^{13}\text{C}$ -labeled OH-PCB surrogate standards were from Wellington Laboratories, Guelph, ON, Canada.  $^{13}\text{C}$ -labeled OH-PCB standards from the mono, octa, and nona homologs were not commercially available.

## Instrument parameters

The GC was equipped with a Supelco SPB-Octyl capillary column (5% phenyl methyl siloxane, 30 m × 0.25 mm ID, 0.25 μm film thicknesses) with helium as the carrier gas flowing at 0.8 mL/min and nitrogen/ argon as the collision gas. The GC operated in solvent vent injection mode at the following injection conditions: initial temperature 45 °C, initial time 0.06 min, ramp 600 °C/min to inlet temperature 325 °C at 4.4 psi. The GC oven temperature program was 45 °C for 2.56 min, 45 to 75 °C at 100 °C/min and hold for 5 min, 75 to 150 °C at 15 °C/min and hold for 1 min, 150 to 280 at 2.5 °C/min and final hold 5 min (total run time 70.86 min). The triple quadrupole MS electron ionization source was set to 260 °C. Congener identity was confirmed by reanalyzing the samples using the same instrument methods equipped with an Agilent Technologies DB-5 capillary column (30 m × 0.25 mm ID, and 1.0 μm film thickness) and an Agilent Technologies DB-1701 capillary column (30 m × 0.25 mm ID, and 0.25 μm film thickness). The MS-MS operated with the precursor-product transitions shown in **Table S3** (PCBs) and **Table S4** (OH-PCBs as MeO-PCBs).

**Table S3** PCB precursor and product masses of unlabeled and <sup>13</sup>C-labeled calibration standards employed in multiple reaction monitoring mode on the triple quadrupole mass spectrometer<sup>a</sup>

| <b>Cl homolog</b>     | <b>Precursor Mass</b> | <b>Product Mass</b> |
|-----------------------|-----------------------|---------------------|
| mono                  | 188                   | 152                 |
| di                    | 222                   | 152                 |
| tri                   | 258                   | 186                 |
| tetra                 | 291.9                 | 222                 |
| penta                 | 325.9                 | 255.9               |
| hexa                  | 359.8                 | 289.9               |
| hepta                 | 393.8                 | 323.9               |
| octa                  | 429.7                 | 359.8               |
| nona                  | 463.7                 | 393.8               |
| deca                  | 497.7                 | 427.9               |
| <sup>13</sup> C-mono  | 200                   | 164                 |
| <sup>13</sup> C-di    | 234                   | 164                 |
| <sup>13</sup> C-tri   | 268                   | 198                 |
| <sup>13</sup> C-tetra | 304                   | 234                 |
| <sup>13</sup> C-penta | 338                   | 268                 |
| <sup>13</sup> C-hexa  | 372                   | 302                 |
| <sup>13</sup> C-hepta | 406                   | 336                 |
| <sup>13</sup> C-octa  | 440                   | 370                 |
| <sup>13</sup> C-nona  | 474                   | 404                 |
| <sup>13</sup> C-deca  | 410.7                 | 438.9               |
| D5 tri                | 261                   | 191                 |

<sup>a</sup>Unlabeled standards were from AccuStandard, New Haven, CT, USA. Labeled standards were from Cambridge Isotope Laboratories, Inc.

**Table S4** MeO-PCB precursor and product masses of unlabeled and <sup>13</sup>C-labeled calibration standards<sup>a</sup>

| Source   | Congener                                    | Abbreviation   | Cl homolog | Precursor | Product |
|----------|---------------------------------------------|----------------|------------|-----------|---------|
| AccuStd  | 4-methoxy-2-chlorobiphenyl                  | 4-MeO-PCB 1    | mono       | 218.6     | 174.9   |
| AccuStd* | 2- methoxy-3-chlorobiphenyl                 | 2-MeO-PCB 2    | mono       | 218.6     | 168     |
| AccuStd* | 2'- methoxy-3-chlorobiphenyl                | 2'-MeO-PCB 2   | mono       | 218.6     | 168     |
| AccuStd* | 3'- methoxy-3-chlorobiphenyl                | 3'-MeO-PCB 2   | mono       | 218.6     | 151.7   |
| AccuStd  | 4- methoxy-3-chlorobiphenyl                 | 4-MeO-PCB 2    | mono       | 218.6     | 174.9   |
| AccuStd* | 4'- methoxy-3-chlorobiphenyl                | 4'-MeO-PCB 2   | mono       | 218.6     | 174.9   |
| AccuStd* | 5-methoxy-3-chlorobiphenyl                  | 5-MeO-PCB 2    | mono       | 218.6     | 151.7   |
| AccuStd  | 6-methoxy-3-chlorobiphenyl                  | 6-MeO-PCB 2    | mono       | 218.6     | 168     |
| AccuStd  | 4'-methoxy-4-chlorobiphenyl                 | 4'-MeO-PCB 3   | mono       | 218.6     | 174.9   |
| AccuStd  | 2'-methoxy-2,3-dichlorobiphenyl             | 2'-MeO-PCB 5   | di         | 253.1     | 201.9   |
| AccuStd  | 3'-methoxy-2,5-dichlorobiphenyl             | 3'-MeO-PCB 9   | di         | 253.1     | 152     |
| AccuStd  | 4'-methoxy-2,5-dichlorobiphenyl             | 4'-MeO-PCB 9   | di         | 253.1     | 210.9   |
| AccuStd  | 2'-methoxy-3,4-dichlorobiphenyl             | 2'-MeO-PCB 12  | di         | 253.1     | 201.9   |
| AccuStd  | 4-methoxy-3,5-dichlorobiphenyl              | 4-MeO-PCB 14   | di         | 253.1     | 210.9   |
| AccuStd  | 4'-methoxy-2,2',5-trichlorobiphenyl         | 4'-MeO-PCB 18  | tri        | 287.5     | 245     |
| AccuStd  | 4'-methoxy-2,3',5-trichlorobiphenyl         | 4'-MeO-PCB 26  | tri        | 287.5     | 245     |
| AccuStd  | 6'-methoxy-2,3',5-trichlorobiphenyl         | 6'-MeO-PCB 26  | tri        | 287.5     | 238     |
| AccuStd  | 2'-methoxy-2,4,6-trichlorobiphenyl          | 2'-MeO-PCB 30  | tri        | 287.5     | 238     |
| AccuStd  | 3'-methoxy-2,4,6-trichlorobiphenyl          | 3'-MeO-PCB 30  | tri        | 287.5     | 245     |
| AccuStd  | 4'-methoxy-2,4,6-trichlorobiphenyl          | 4'-MeO-PCB 30  | tri        | 287.5     | 245     |
| AccuStd  | 3-methoxy-2,2',6,6'-tetrachlorobiphenyl     | 3-MeO-PCB 54   | tetra      | 322.0     | 278.8   |
| AccuStd  | 2'-methoxy-2,3,4,5-tetrachlorobiphenyl      | 2'-MeO-PCB 61  | tetra      | 322.0     | 272     |
| AccuStd  | 3'-methoxy-2,3,4,5-tetrachlorobiphenyl      | 3'-MeO-PCB 61  | tetra      | 322.0     | 278.8   |
| Well     | 4'-methoxy -2,3,4,5-tetrachlorobiphenyl     | 4'-MeO-PCB 61  | tetra      | 322.0     | 278.8   |
| AccuStd  | 2'-methoxy-2,3,5,6-tetrachlorobiphenyl      | 2'-MeO-PCB 65  | tetra      | 322.0     | 272     |
| AccuStd  | 3'-methoxy-2,3,5,6-tetrachlorobiphenyl      | 3'-MeO-PCB 65  | tetra      | 322.0     | 278.8   |
| AccuStd* | 4-methoxy-2,3,5,6-tetrachlorobiphenyl       | 4-MeO-PCB 65   | tetra      | 322.0     | 278.8   |
| AccuStd* | 4'-methoxy-2,3,5,6-tetrachlorobiphenyl      | 4'-MeO-PCB 65  | tetra      | 322.0     | 278.8   |
| AccuStd  | 4'-methoxy-2,3',4,6-tetrachlorobiphenyl     | 4'-MeO-PCB 69  | tetra      | 322.0     | 278.8   |
| AccuStd  | 6'-methoxy-2,3',4,6-tetrachlorobiphenyl     | 6'-MeO-PCB 69  | tetra      | 322.0     | 272     |
| AccuStd  | 4'-methoxy-2,3',5,5'-tetrachlorobiphenyl    | 4'-MeO-PCB 72  | tetra      | 322.0     | 278.8   |
| Well     | 4'-methoxy-3,3',4,5'-tetrachlorobiphenyl    | 4'-MeO-PCB 79  | tetra      | 322.0     | 278.8   |
| AccuStd  | 6'-methoxy-2,2',3,3',5-pentachlorobiphenyl  | 6'-MeO-PCB 83  | penta      | 356.4     | 305.8   |
| AccuStd  | 4'-methoxy-2,2',3,4,5-pentachlorobiphenyl   | 4'-MeO-PCB 86  | penta      | 356.4     | 312.9   |
| AccuStd  | 4'-methoxy-2,2',3,5,6-pentachlorobiphenyl   | 4'-MeO-PCB 93  | penta      | 356.4     | 312.9   |
| Well     | 4'-methoxy-2,2',3',4,5-pentachlorobiphenyl  | 4'-MeO-PCB 97  | penta      | 356.4     | 312.9   |
| Well     | 4'-methoxy-2,2',4,5,5'-pentachlorobiphenyl  | 4'-MeO-PCB 101 | penta      | 356.4     | 312.9   |
| AccuStd  | 6'-methoxy-2,2',4,5,5'-pentachlorobiphenyl  | 6'-MeO-PCB 101 | penta      | 356.4     | 305.8   |
| AccuStd  | 6'-methoxy-2,3,3',4,5-pentachlorobiphenyl   | 6'-MeO-PCB 106 | penta      | 356.4     | 305.8   |
| Well     | 4-methoxy-2,3,3',4',5-pentachlorobiphenyl   | 4-MeO-PCB 107  | penta      | 356.4     | 312.9   |
| Well     | 4'-methoxy-2,3,3',4',5'-pentachlorobiphenyl | 4'-MeO-PCB 108 | penta      | 356.4     | 312.9   |
| Well     | 2'methoxy-2,3,4,4',5-pentachlorobiphenyl    | 2'-MeO-PCB 114 | penta      | 356.4     | 305.8   |
| Well     | 3-methoxy-2,3',4,4',5-pentachlorobiphenyl   | 3-MeO-PCB 118  | penta      | 356.4     | 312.9   |

**Table S4, continued**

|         |                                                       |                                |                       |       |       |
|---------|-------------------------------------------------------|--------------------------------|-----------------------|-------|-------|
| Well    | 4'-methoxy-2,3',4,5,5'-pentachlorobiphenyl            | 4'-MeO-PCB 120                 | penta                 | 356.4 | 312.9 |
| Well    | 4'-methoxy-3,3',4,5,5'-pentachloro-biphenyl           | 4'-MeO-PCB 127                 | penta                 | 356.4 | 340.7 |
| Well    | 4'-methoxy-2,2',3,3',4,5'-hexachlorobiphenyl          | 4'-MeO-PCB 130                 | hexa                  | 390.9 | 346.8 |
| Well    | 4-methoxy-2,2',3,3',5,6-hexachlorobiphenyl            | 4-MeO-PCB 134                  | hexa                  | 390.9 | 346.8 |
| Well    | 3'-methoxy-2,2',3,4,4',5'-hexachlorobiphenyl          | 3'-MeO-PCB 138                 | hexa                  | 390.9 | 346.8 |
| AccuStd | 5-methoxy-2,2',3,4,4',5'-hexachlorobiphenyl           | 5-MeO-PCB 138                  | hexa                  | 390.9 | 346.8 |
| Well    | 4-methoxy-2,2',3,4',5,5'-hexachlorobiphenyl           | 4-MeO-PCB 146                  | hexa                  | 390.9 | 346.8 |
| Well    | 3,3'-dimethoxy-2,2',4,4',6,6'-hexachlorobiphenyl      | 3,3'-diMeO-PCB 155             | hexa di MeO           | 420.9 | 376.7 |
| Well    | 4'-methoxy-2,3,3',4,5,5'-hexachlorobiphenyl           | 4'-MeO-PCB 159                 | hexa                  | 390.9 | 346.8 |
| Well    | 4-methoxy-2,3,3',4',5,5'-hexachlorobiphenyl           | 4-MeO-PCB 162                  | hexa                  | 390.9 | 346.8 |
| Well    | 4-methoxy-2,3,3',4',5,6-hexachlorobiphenyl            | 4-MeO-PCB 163                  | hexa                  | 390.9 | 346.8 |
| Well    | 4'-methoxy-2,2',3,3',4,5,5'-heptachlorobiphenyl       | 4'-MeO-PCB 172                 | hepta                 | 425.3 | 382.8 |
| Well    | 4-methoxy-2,2',3,3',4',5,6-heptachlorobiphenyl        | 4-MeO-PCB 177                  | hepta                 | 425.3 | 382.8 |
| Well    | 4-methoxy-2,2',3,3',5,5',6-heptachlorobiphenyl        | 4-MeO-PCB 178                  | hepta                 | 425.3 | 382.8 |
| Well    | 3'-methoxy-2,2',3,4,4',5,5'-heptachlorobiphenyl       | 3'-MeO-PCB 180                 | hepta                 | 425.3 | 382.8 |
| Well    | 3'-methoxy-2,2',3,4,4',5,6'-heptachlorobiphenyl       | 3'-MeO-PCB 182                 | hepta                 | 425.3 | 382.8 |
| Well    | 3'-methoxy-2,2',3,4,4',5',6-heptachlorobiphenyl       | 3'-MeO-PCB 183                 | hepta                 | 425.3 | 382.8 |
| AccuStd | 5-methoxy-2,2',3,4,4',5',6-heptachlorobiphenyl        | 5-MeO-PCB 183                  | hepta                 | 425.3 | 382.8 |
| Well    | 3'-methoxy 2,2',3,4,4',6,6'-heptachlorobiphenyl       | 3'-MeO-PCB 184                 | hepta                 | 425.3 | 382.8 |
| Well    | 4-methoxy-2,2',3,4',5,5',6-heptachlorobiphenyl        | 4-MeO-PCB187                   | hepta                 | 425.3 | 382.8 |
| Well    | 4-methoxy-2,3,3',4',5,5',6-heptachlorobiphenyl        | 4-MeO-PCB193                   | hepta                 | 425.3 | 382.8 |
| Well    | 4'-methoxy-2,2',3,3',4,5,5',6-octachlorobiphenyl      | 4'-MeO-PCB198                  | octa                  | 459.8 | 416.8 |
| Well    | 4'-methoxy-2,2',3,3',4,5,5',6'-octachlorobiphenyl     | 4'-MeO-PCB199                  | octa                  | 459.8 | 416.8 |
| Well    | 4'-methoxy-2,2',3,3',4,5,6,6'-octachlorobiphenyl      | 4'-MeO-PCB200                  | octa                  | 459.8 | 416.8 |
| Well    | 4'-methoxy-2,2',3,3',4,5',6,6'-octachlorobiphenyl     | 4'-MeO-PCB201                  | octa                  | 459.8 | 416.8 |
| Well    | 4-methoxy-2,2',3,3',5,5',6,6'-octachlorobiphenyl      | 4-MeO-PCB202                   | octa                  | 459.8 | 416.8 |
| Well    | 4,4'-dimethoxy-2,2',3,3',5,5',6,6'-octachlorobiphenyl | 4,4'-diMeO-PCB202              | octa di MeO           | 489.8 | 446.7 |
| Well    | 3'-methoxy-2,2',3,4,4',5,5',6-octachlorobiphenyl      | 3'-MeO-PCB203                  | octa                  | 459.8 | 416.8 |
| Well    | 4'-methoxy 2,2',3,3',4,5,5',6,6'-nonachlorobiphenyl   | 4'-MeO-PCB208                  | nona                  | 494.2 | 450.7 |
| Well    | 2,4,5-trichloro-4'-methoxy[13C]biphenyl               | <sup>13</sup> C 4'MeO-PCB 29   | <sup>13</sup> C tri   | 298   | 253   |
| Well    | 2,3,4,5-tetrachloro-4'-methoxy[13C]biphenyl           | <sup>13</sup> C 4'MeO-PCB 61   | <sup>13</sup> C tetra | 332   | 287.9 |
| Well    | 2,3',4,5,5'-pentachloro-4'-methoxy[13C]biphenyl       | <sup>13</sup> C 4' MeO-PCB 120 | <sup>13</sup> C penta | 368.4 | 323.7 |
| Well    | 2,3,3',4,5,5'-hexachloro-4'-methoxy[13C]biphenyl      | <sup>13</sup> C 4'MeO-PCB 159  | <sup>13</sup> C hexa  | 402   | 357.7 |
| Well    | 2,2',3,3',4,5,5'-heptachloro-4'-methoxy[13C]biphenyl  | <sup>13</sup> C 4'MeO PCB172   | <sup>13</sup> C hepta | 437.3 | 393.8 |
| Well    | 2,2',3,4',5,5',6-heptachloro-4-methoxy[13C]biphenyl   | <sup>13</sup> C 4 MeO-PCB 187  | <sup>13</sup> C hepta | 437.3 | 393.8 |

\*Standards were sourced from AccuStandard (AccuStd) and Wellington Laboratories (Well). An asterisk (\*) next to a compound source indicates custom production.

**Table S5** Limit of quantification (LOQ) for each PCB congener or group of co-eluting congeners in units of nanograms<sup>a</sup>

| PCB         | LOQ   | PCB           | LOQ   | PCB     | LOQ   | PCB     | LOQ   |
|-------------|-------|---------------|-------|---------|-------|---------|-------|
| 1           | 0.109 | 63            | 0.002 | 133     | 0.002 | 197     | 0.030 |
| 2           | 0.005 | 64            | 0.022 | 134     | 0.005 | 198+199 | 0.026 |
| 3           | 0.134 | 66            | 0.019 | 135+151 | 0.032 | 200     | 0.023 |
| 4           | 0.104 | 67            | 0.003 | 136     | 0.020 | 201     | 0.003 |
| 5           | 0.532 | 68            | 0.003 | 137     | 0.004 | 202     | 0.005 |
| 6           | 0.016 | 72            | 0.002 | 139+140 | 0.002 | 203     | 0.017 |
| 7           | 0.008 | 73            | 0.002 | 141     | 0.010 | 205     | 0.013 |
| 8           | 0.071 | 77            | 0.007 | 142     | 0.004 | 206     | 0.033 |
| 9           | 0.009 | 78            | 0.005 | 143     | 0.003 | 207     | 0.009 |
| 10          | 0.016 | 79            | 0.004 | 144     | 0.003 | 208     | 0.007 |
| 11          | 0.083 | 80            | 0.002 | 145     | 0.002 | 209     | 0.072 |
| 12+13       | 0.195 | 81            | 0.005 | 146     | 0.005 |         |       |
| 14          | 0.011 | 82            | 0.080 | 147+149 | 0.067 |         |       |
| 15          | 0.015 | 83            | 0.010 | 148     | 0.002 |         |       |
| 16          | 0.035 | 84            | 0.037 | 150     | 0.002 |         |       |
| 17          | 0.024 | 85+116        | 0.010 | 152     | 0.002 |         |       |
| 18+30       | 0.057 | 86+97+109+119 | 0.037 | 153+168 | 0.038 |         |       |
| 19          | 0.032 | 87+125        | 0.041 | 154     | 0.001 |         |       |
| 20+28       | 0.036 | 88            | 0.003 | 155     | 0.002 |         |       |
| 21+33       | 0.032 | 89            | 0.005 | 156+157 | 0.003 |         |       |
| 22          | 0.018 | 90+101+113    | 0.130 | 158     | 0.007 |         |       |
| 23          | 0.004 | 91            | 0.015 | 159     | 0.002 |         |       |
| 24          | 0.003 | 92            | 0.021 | 160     | 0.002 |         |       |
| 25          | 0.144 | 93+100        | 0.004 | 161     | 0.001 |         |       |
| 26+29       | 0.013 | 94            | 0.004 | 162     | 0.002 |         |       |
| 27          | 0.008 | 95            | 0.154 | 164     | 0.003 |         |       |
| 31          | 0.036 | 96            | 0.002 | 165     | 0.001 |         |       |
| 32          | 0.019 | 98            | 0.003 | 167     | 0.003 |         |       |
| 34          | 0.002 | 99            | 0.038 | 169     | 0.003 |         |       |
| 35          | 0.012 | 102           | 0.010 | 170     | 0.012 |         |       |
| 36          | 0.011 | 103           | 0.010 | 171+173 | 0.009 |         |       |
| 37          | 0.025 | 104           | 0.003 | 172     | 0.008 |         |       |
| 38          | 0.002 | 105           | 0.014 | 174     | 0.013 |         |       |
| 39          | 0.023 | 106           | 0.015 | 175     | 0.012 |         |       |
| 40+71       | 0.031 | 107+124       | 0.008 | 176     | 0.002 |         |       |
| 41          | 0.027 | 108           | 0.009 | 177     | 0.029 |         |       |
| 42          | 0.012 | 110           | 0.082 | 178     | 0.003 |         |       |
| 43          | 0.004 | 111           | 0.003 | 179     | 0.006 |         |       |
| 44+47+65    | 0.066 | 112           | 0.007 | 180+193 | 0.031 |         |       |
| 45          | 0.009 | 114           | 0.004 | 181     | 0.006 |         |       |
| 46          | 0.007 | 115           | 0.021 | 182     | 0.008 |         |       |
| 48          | 0.011 | 117           | 0.012 | 183     | 0.008 |         |       |
| 49+69       | 0.041 | 118           | 0.049 | 184     | 0.003 |         |       |
| 50+53       | 0.030 | 120           | 0.004 | 185     | 0.006 |         |       |
| 51          | 0.006 | 121           | 0.004 | 186     | 0.001 |         |       |
| 52          | 0.142 | 122           | 0.004 | 187     | 0.024 |         |       |
| 54          | 0.001 | 123           | 0.009 | 188     | 0.002 |         |       |
| 55          | 0.006 | 126           | 0.006 | 189     | 0.011 |         |       |
| 56          | 0.056 | 127           | 0.005 | 190     | 0.018 |         |       |
| 57          | 0.002 | 128+166       | 0.025 | 191     | 0.005 |         |       |
| 58          | 0.002 | 129+138+163   | 0.048 | 192     | 0.005 |         |       |
| 59+62+75    | 0.008 | 130           | 0.003 | 194     | 0.034 |         |       |
| 60          | 0.010 | 131           | 0.001 | 195     | 0.013 |         |       |
| 61+70+74+76 | 0.076 | 132           | 0.021 | 196     | 0.012 |         |       |

<sup>a</sup>The LOQ was calculated as the upper limit of the 99% confidence interval of the mass in the blanks (average + 3\*standard deviation).

**Table S6** Limit of Quantification (LOQ) for each MeO-PCB congener or group of co-eluting congeners in units of nanograms<sup>a</sup>

| MeO-PCB                     | LOQ    | MeO-PCB                                      | LOQ    |
|-----------------------------|--------|----------------------------------------------|--------|
| 4-MeO-PCB 1                 | 0.0062 | 4'-MeO-PCB 97                                | 0.0009 |
| 2-MeO-PCB 2                 | 0.0443 | 6'-MeO-PCB 101                               | 0.0002 |
| 4-MeO-PCB 2                 | 0.1044 | 4'-MeO-PCB 101                               | 0.0006 |
| 5-MeO-PCB 2                 | 0.0008 | 2'-MeO-PCB 106+2'-MeO-PCB 114                | 0.0001 |
| 6-MeO-PCB 2                 | 0.0359 | 4-MeO-PCB 107                                | 0.0014 |
| 2'-MeO-PCB 2                | 0.0005 | 4'-MeO-PCB 108                               | 0.0016 |
| 3'-MeO-PCB 2                | 0.0012 | 3-MeO-PCB 118                                | 0.0004 |
| 4'-MeO-PCB 2                | 0.0208 | 4'-MeO-PCB 120                               | 0.0007 |
| 4'-MeO-PCB 3                | 0.0088 | 4'-MeO-PCB 127                               | 0.0005 |
| 2'-MeO-PCB 5                | 0.0081 | 4'-MeO-PCB 130                               | 0.0275 |
| 3'-MeO-PCB 9                | 0.0777 | 4-MeO-PCB 134                                | 0.0086 |
| 4'-MeO-PCB 9+4-MeO-PCB 14   | *      | 5-MeO-PCB 138                                | 0.0084 |
| 2'-MeO-PCB 12               | 0.0176 | 3'-MeO-PCB 138                               | 0.0035 |
| 4'-MeO-PCB 18               | 0.0045 | 4-MeO-PCB 146                                | 0.0150 |
| 4'-MeO-PCB 26               | 0.0008 | 3,3'-diMeO-PCB 155                           | 0.0200 |
| 6'-MeO-PCB 26               | 0.0002 | 4'-MeO-PCB 159                               | 0.0116 |
| 2'-MeO-PCB 30               | 0.0004 | 4-MeO-PCB 162                                | 0.0144 |
| 3'-MeO-PCB 30               | 0.0059 | 4-MeO-PCB 163                                | 0.0062 |
| 4'-MeO-PCB 30               | 0.0016 | 4'-MeO-PCB 172                               | 0.0034 |
| 3-MeO-PCB 54                | 0.0024 | 4-MeO-PCB 177                                | 0.0003 |
| 2'-MeO-PCB 61               | 0.0001 | 4-MeO-PCB 178                                | 0.0005 |
| 3'-MeO-PCB 61               | 0.0006 | 3'-MeO-PCB 180                               | 0.0009 |
| 4'-MeO-PCB 61               | 0.0001 | 3'-MeO-PCB 182                               | 0.0007 |
| 4-MeO-PCB 65                | 0.0007 | 5-MeO-PCB 183+4-MeO-PCB 187                  | 0.0018 |
| 2'-MeO-PCB 65+6'-MeO-PCB 69 | 0.0001 | 3'-MeO-PCB 183                               | 0.0015 |
| 3'-MeO-PCB 65               | 0.0006 | 3'-MeO-PCB 184                               | 0.0009 |
| 4'-MeO-PCB 65               | 0.0001 | 4-MeO-PCB 193                                | 0.0014 |
| 4'-MeO-PCB 69               | 0.0001 | 4'-MeO-PCB 198+4'-MeO-PCB 200+3'-MeO-PCB 203 | 0.0002 |
| 4'-MeO-PCB 72               | 0.0002 | 4'-MeO-PCB 199                               | 0.0001 |
| 4'-MeO-PCB 79               | 0.0005 | 4'-MeO-PCB 201                               | 0.0002 |
| 6'-MeO-PCB 83               | 0.0001 | 4-MeO-PCB 202                                | 0.0000 |
| 4'-MeO-PCB 86               | 0.0011 | 4,4'-diMeO-PCB 202                           | 0.0002 |
| 4'-MeO-PCB 93               | 0.0031 | 4'-MeO-PCB 208                               | 0.0005 |

<sup>a</sup>The LOQ was calculated as the upper limit of the 99% confidence interval of the mass in the blanks (average + 3\*standard deviation). The asterisk (\*) indicates a set of co-eluting congeners that was removed from the data set after their presence in the samples could not be confirmed on a second GC column (DB1701).



## Quality Control results

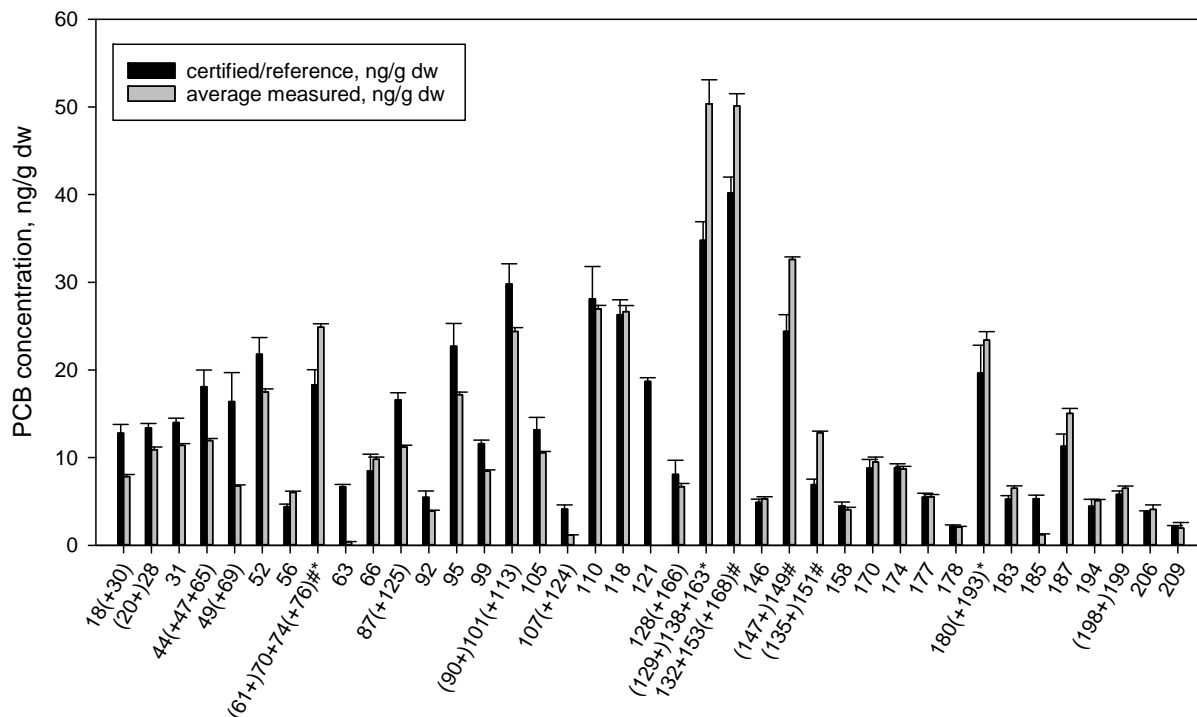

**Figure S1** NIST certified/reference concentrations compared to average measured concentrations (n=4) in SRM 2585 (Organic Contaminants in House Dust). Error bars represent uncertainty (NIST) and standard deviation (measured). Measured concentrations are not corrected for surrogate standard recovery. # indicates difference between NIST certified/reference and measured values likely due to contribution from co-eluting congener(s) in the measured value. \* indicates NIST congeners eluted separately but were added together because they co-elute in our method. Largest uncertainty of the two congeners was used as estimate for NIST uncertainty.

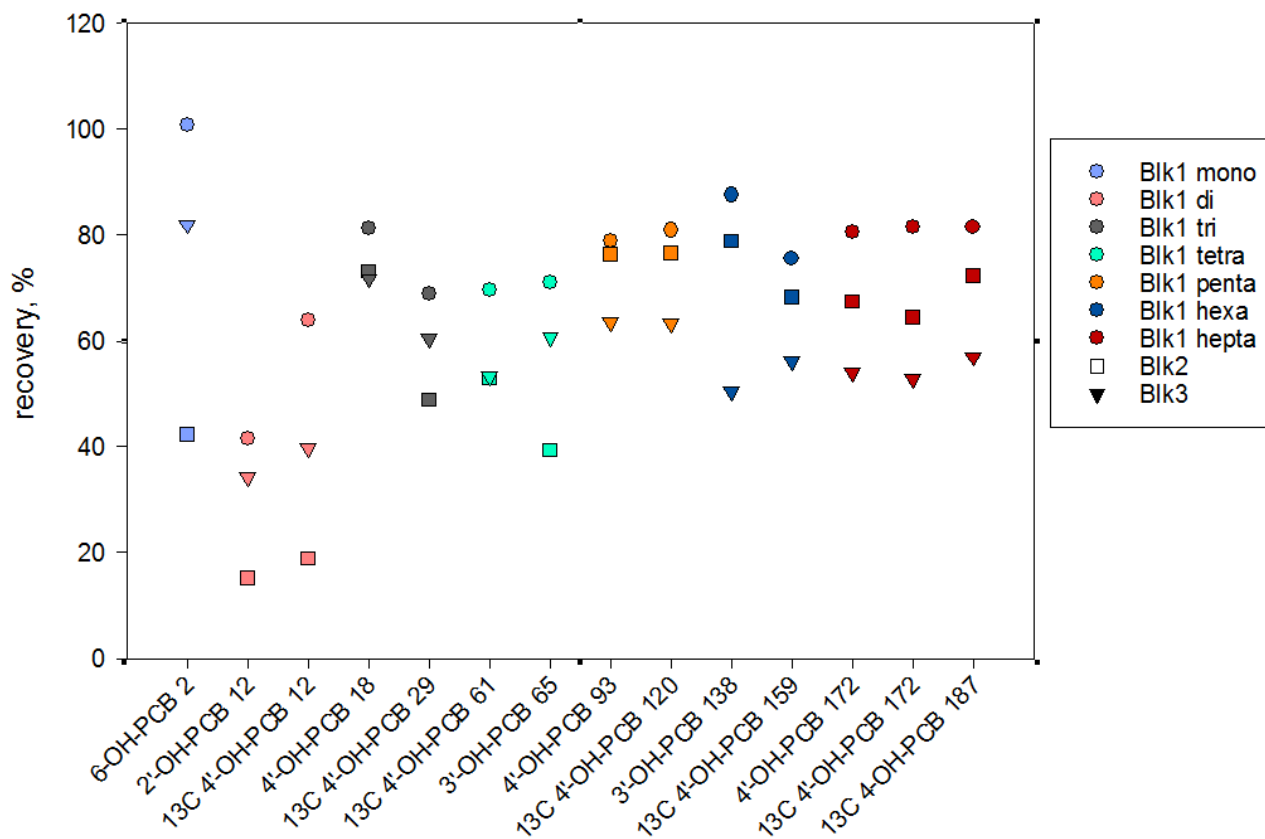

**Figure S2** Recoveries of  $^{13}\text{C}$ -labeled and unlabeled OH-PCBs in blanks (n=3). Representativeness of  $^{13}\text{C}$  labeled SS compared to non-labeled OH-PCBs and efficiency of OH-PCB extraction from PUF was assessed with these replicates. Data points of the same color represent the same chlorine homolog, from mono- to hepta-chlorinated. There was insufficient diazomethane available for Blank 2 which resulted in lower recoveries.

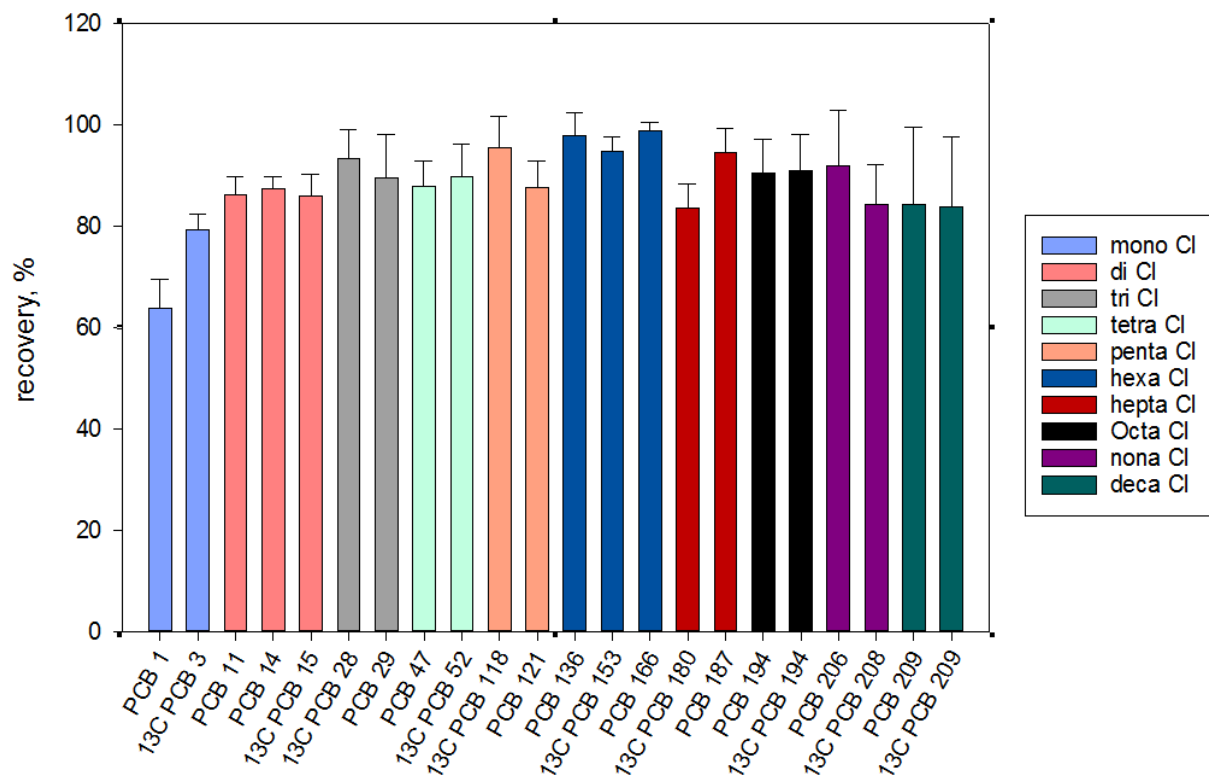

**Figure S3** Average recoveries of <sup>13</sup>C labeled and unlabeled PCBs in blanks (n=3). Representativeness of <sup>13</sup>C labeled SS compared to non-labeled PCBs and efficiency of PCB extraction from PUF was assessed with these replicates. Error bars represent the standard deviation (n=3). Bars of the same color represent PCBs from the same chlorine homolog, from mono- to deca-chlorinated.

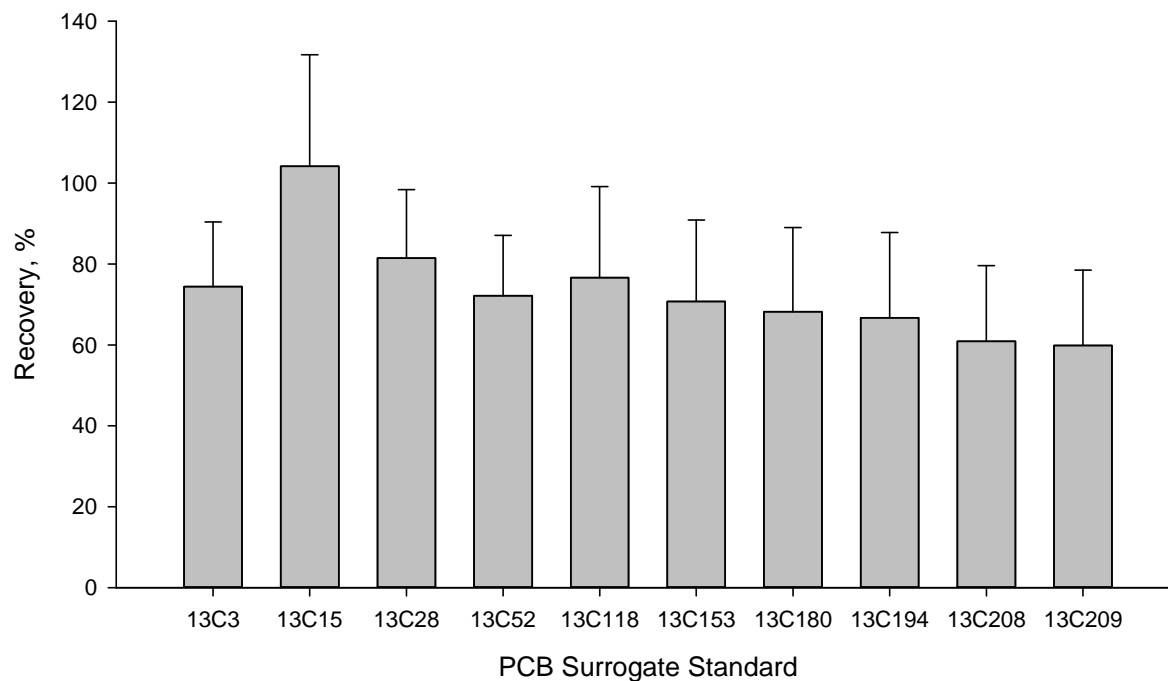

**Figure S4** Average recoveries of  $^{13}\text{C}$  labeled PCB surrogate standards in all samples and blanks. Error bars represent the standard deviation (n=146). Surrogate standard recoveries were used to correct sample masses according to same Cl homolog except as follows: Recoveries of  $^{13}\text{C}$  PCB 15 were not used to correct sample mass due to matrix interferences leading to artificially high recoveries not representative of the entire di-Cl homolog. Instead, recoveries of  $^{13}\text{C}$  PCB 28 (tri-Cl) were used to correct di-Cl sample masses.

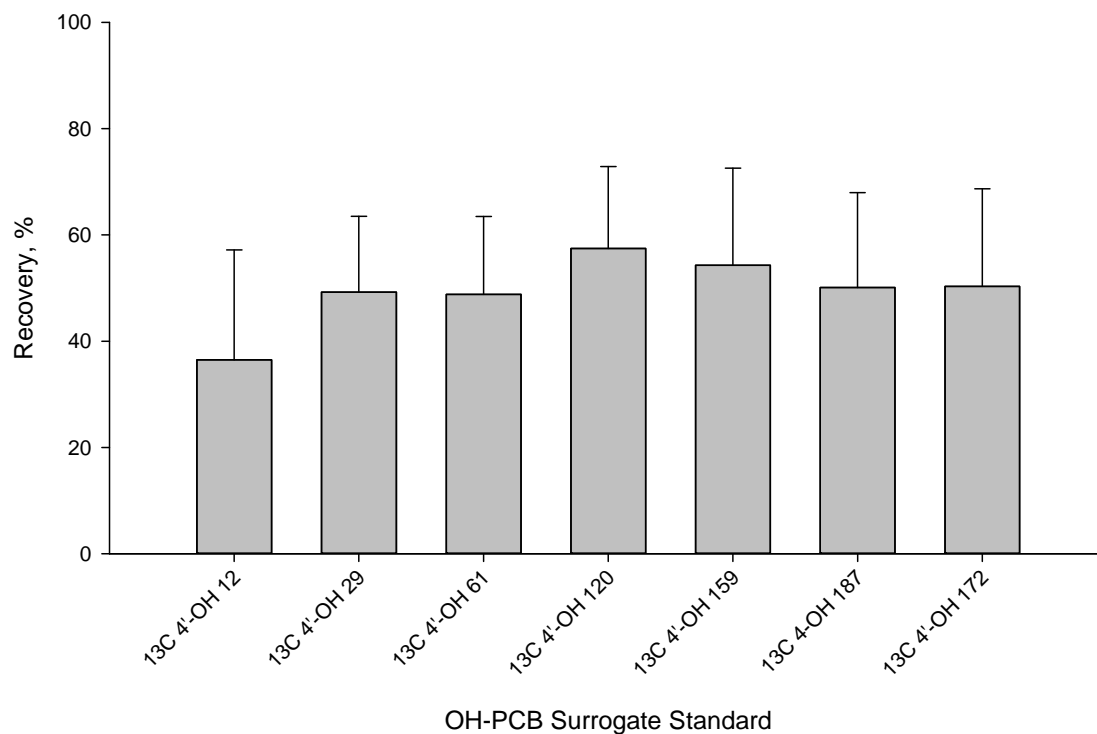

**Figure S5** Average recoveries of  $^{13}\text{C}$  labeled OH-PCB surrogate standards (quantified as MeO-PCBs) in all samples and blanks. Error bars represent the standard deviation ( $n=77$ ). Surrogate standard recoveries were used to correct sample masses according to same Cl homolog, except as follows: Recoveries of mono-Cl sample masses were corrected using the tri-Cl standard; octa-, and nona-Cl sample masses were corrected using the hepta-Cl standards; and recoveries of  $^{13}\text{C}$  OH-PCB 12 were not used to correct sample mass due to matrix interferences leading to artificially low recoveries not representative of the entire di-Cl homolog. Instead, recoveries of  $^{13}\text{C}$  OH-PCB 29 (tri-Cl) were used to correct di-Cl sample masses.

**Table S7** Summary data of volume of air breathed (m<sup>3</sup>/day) for each child enrolled in the AESOP study according to survey data collected on their activity level during each season of school attendance

| <b>child group</b>         | <b>statistic</b>            | <b>winter</b> | <b>spring</b> | <b>autumn</b> |
|----------------------------|-----------------------------|---------------|---------------|---------------|
| East Chicago<br>girls      | n                           | 18            | 18            | 18            |
|                            | minimum                     | 1.9           | 2.1           | 2.0           |
|                            | 5 <sup>th</sup> percentile  | 2.0           | 2.3           | 2.2           |
|                            | average                     | 2.9           | 3.2           | 3.1           |
|                            | median                      | 2.7           | 3.0           | 2.9           |
|                            | 95 <sup>th</sup> percentile | 4.4           | 4.9           | 4.8           |
|                            | maximum                     | 4.8           | 5.3           | 5.1           |
| East Chicago<br>boys       | n                           | 15            | 15            | 15            |
|                            | minimum                     | 2.2           | 2.4           | 2.4           |
|                            | 5 <sup>th</sup> percentile  | 2.5           | 2.8           | 2.7           |
|                            | average                     | 3.2           | 3.5           | 3.4           |
|                            | median                      | 2.9           | 3.2           | 3.1           |
|                            | 95 <sup>th</sup> percentile | 4.5           | 5.0           | 4.6           |
|                            | maximum                     | 5.1           | 5.6           | 4.8           |
| Columbus Junction<br>girls | n                           | 20            | 20            | 20            |
|                            | minimum                     | 2.5           | 2.8           | 2.7           |
|                            | 5 <sup>th</sup> percentile  | 2.6           | 2.8           | 2.8           |
|                            | average                     | 3.1           | 3.5           | 3.4           |
|                            | median                      | 3.1           | 3.5           | 3.4           |
|                            | 95 <sup>th</sup> percentile | 3.9           | 4.3           | 4.2           |
|                            | maximum                     | 4.0           | 4.4           | 4.3           |
| Columbus Junction<br>boys  | n                           | 23            | 23            | 23            |
|                            | minimum                     | 2.2           | 2.5           | 2.4           |
|                            | 5 <sup>th</sup> percentile  | 2.4           | 2.6           | 2.6           |
|                            | average                     | 3.5           | 3.9           | 3.8           |
|                            | median                      | 3.5           | 3.9           | 3.8           |
|                            | 95 <sup>th</sup> percentile | 4.8           | 5.6           | 5.1           |
|                            | maximum                     | 5.6           | 6.2           | 6.0           |

## Results

Indoor and outdoor OH-PCB concentration summary data are shown in Table S8. Indoor and outdoor PCB concentration summary data are shown in Tables S9-S13.

**Table S8** Indoor and outdoor OH-PCB concentration summary data for the 11 congeners detected in at least one sample from the six schools in this study: percent detection (%) and median, 5<sup>th</sup> percentile, and 95<sup>th</sup> percentile (pg/m<sup>3</sup>)

| OH-PCB         | Indoor |        |                   |                    | Outdoor |        |                   |                    |
|----------------|--------|--------|-------------------|--------------------|---------|--------|-------------------|--------------------|
|                | %Det   | Median | 5 <sup>th</sup> % | 95 <sup>th</sup> % | %Det    | Median | 5 <sup>th</sup> % | 95 <sup>th</sup> % |
| ΣOH-PCBs       | 100    | 43.808 | 4.795             | 431.365            | 76      | 1.020  | 0                 | 10.481             |
| 3'-OH-PCB 2    | 53     | 0.876  | 0                 | 43.648             | 16      | 0      | 0                 | 0.457              |
| 2-OH-PCB 2     | 97     | 18.806 | 2.439             | 154.310            | 68      | 0.901  | 0                 | 2.822              |
| 2'-OH-PCB 2    | 9      | 0      | 0                 | 3.117              | 4       | 0      | 0                 | 0                  |
| 6-OH-PCB 2     | 94     | 13.670 | 1.205             | 238.715            | 36      | 0      | 0                 | 1.485              |
| 2'-OH-PCB 12   | 3      | 0      | 0                 | 0                  | 4       | 0      | 0                 | 0                  |
| 3'-OH-PCB 65   | 6      | 0      | 0                 | 0.227              | 12      | 0      | 0                 | 0.411              |
| 4'-OH-PCB 72   | 3      | 0      | 0                 | 0                  | 0       | 0      | 0                 | 0                  |
| 4'-OH-PCB 69   | 0      | 0      | 0                 | 0                  | 4       | 0      | 0                 | 0                  |
| 4'-OH-PCB 198+ |        |        |                   |                    |         |        |                   |                    |
| 4'-OH-PCB 200+ |        |        |                   |                    |         |        |                   |                    |
| 3'-OH-PCB 203  | 0      | 0      | 0                 | 0                  | 4       | 0      | 0                 | 0                  |

**Table S9** EC School 1 indoor and outdoor PCB concentration summary data: percent detection (%) and median, 5<sup>th</sup> percentile, and 95<sup>th</sup> percentile (ng/m<sup>3</sup>)

| PCB      | Indoor |        |                   |                    | Outdoor |        |                   |                    |
|----------|--------|--------|-------------------|--------------------|---------|--------|-------------------|--------------------|
|          | %Det   | Median | 5 <sup>th</sup> % | 95 <sup>th</sup> % | %Det    | Median | 5 <sup>th</sup> % | 95 <sup>th</sup> % |
| ΣPCBs    | 100    | 7.873  | 4.659             | 25.557             | 100     | 0.210  | 0.157             | 0.614              |
| 1        | 100    | 0.063  | 0.052             | 0.099              | 100     | 0.005  | 0.003             | 0.019              |
| 2        | 100    | 0.008  | 0.008             | 0.016              | 100     | 0.002  | 0.001             | 0.002              |
| 3        | 100    | 0.047  | 0.031             | 0.071              | 100     | 0.005  | 0.003             | 0.006              |
| 4        | 100    | 0.115  | 0.047             | 0.224              | 100     | 0.010  | 0.004             | 0.023              |
| 5        | 0      | <LOQ   | <LOQ              | <LOQ               | 0       | <LOQ   | <LOQ              | <LOQ               |
| 6        | 100    | 0.053  | 0.022             | 0.130              | 100     | 0.002  | 0.001             | 0.006              |
| 7        | 100    | 0.009  | 0.004             | 0.022              | 100     | 0.000  | 0.000             | 0.001              |
| 8        | 100    | 0.276  | 0.117             | 0.699              | 100     | 0.010  | 0.005             | 0.026              |
| 9        | 100    | 0.015  | 0.006             | 0.035              | 100     | 0.001  | 0.000             | 0.002              |
| 10       | 100    | 0.004  | 0.002             | 0.007              | 100     | 0.000  | 0.000             | 0.001              |
| 11       | 100    | 0.191  | 0.094             | 0.660              | 100     | 0.006  | 0.003             | 0.013              |
| 12+13    | 100    | 0.013  | 0.006             | 0.039              | 0       | <LOQ   | <LOQ              | <LOQ               |
| 14       | 100    | 0.001  | 0.000             | 0.001              | 40      | <LOQ   | <LOQ              | 0.000              |
| 15       | 100    | 0.069  | 0.033             | 0.238              | 100     | 0.002  | 0.001             | 0.005              |
| 16       | 100    | 0.205  | 0.109             | 0.569              | 100     | 0.004  | 0.003             | 0.013              |
| 17       | 100    | 0.177  | 0.096             | 0.451              | 100     | 0.004  | 0.003             | 0.012              |
| 18+30    | 100    | 0.427  | 0.231             | 1.058              | 100     | 0.011  | 0.007             | 0.028              |
| 19       | 100    | 0.040  | 0.022             | 0.094              | 100     | 0.002  | 0.001             | 0.004              |
| 20+28    | 100    | 0.352  | 0.186             | 1.017              | 100     | 0.007  | 0.005             | 0.021              |
| 21+33    | 100    | 0.235  | 0.122             | 0.694              | 100     | 0.005  | 0.003             | 0.012              |
| 22       | 100    | 0.124  | 0.064             | 0.389              | 100     | 0.003  | 0.002             | 0.007              |
| 23       | 40     | <LOQ   | <LOQ              | 0.001              | 0       | <LOQ   | <LOQ              | <LOQ               |
| 24       | 100    | 0.004  | 0.003             | 0.013              | 100     | 0.000  | 0.000             | 0.000              |
| 25       | 100    | 0.026  | 0.014             | 0.079              | 20      | <LOQ   | <LOQ              | 0.002              |
| 26+29    | 100    | 0.065  | 0.033             | 0.182              | 100     | 0.002  | 0.001             | 0.004              |
| 27       | 100    | 0.022  | 0.012             | 0.061              | 100     | 0.001  | 0.000             | 0.002              |
| 31       | 100    | 0.386  | 0.198             | 1.060              | 100     | 0.007  | 0.005             | 0.020              |
| 32       | 100    | 0.113  | 0.061             | 0.298              | 100     | 0.003  | 0.002             | 0.007              |
| 34       | 80     | 0.001  | 0.000             | 0.003              | 40      | <LOQ   | <LOQ              | 0.000              |
| 35       | 80     | 0.004  | 0.001             | 0.009              | 40      | <LOQ   | <LOQ              | 0.000              |
| 36       | 0      | <LOQ   | <LOQ              | <LOQ               | 0       | <LOQ   | <LOQ              | <LOQ               |
| 37       | 100    | 0.031  | 0.015             | 0.110              | 80      | 0.001  | 0.000             | 0.002              |
| 38       | 20     | <LOQ   | <LOQ              | 0.001              | 0       | <LOQ   | <LOQ              | <LOQ               |
| 39       | 0      | <LOQ   | <LOQ              | <LOQ               | 0       | <LOQ   | <LOQ              | <LOQ               |
| 40+71    | 100    | 0.083  | 0.061             | 0.281              | 100     | 0.003  | 0.002             | 0.007              |
| 41       | 100    | 0.023  | 0.016             | 0.073              | 100     | 0.001  | 0.001             | 0.002              |
| 42       | 100    | 0.060  | 0.039             | 0.187              | 100     | 0.002  | 0.001             | 0.005              |
| 43       | 100    | 0.012  | 0.010             | 0.033              | 100     | 0.000  | 0.000             | 0.001              |
| 44+47+65 | 100    | 0.303  | 0.205             | 0.908              | 100     | 0.008  | 0.006             | 0.022              |
| 45       | 100    | 0.065  | 0.046             | 0.174              | 100     | 0.002  | 0.002             | 0.005              |
| 46       | 100    | 0.020  | 0.015             | 0.060              | 100     | 0.001  | 0.001             | 0.002              |
| 48       | 100    | 0.062  | 0.044             | 0.190              | 100     | 0.002  | 0.001             | 0.004              |
| 49+69    | 100    | 0.191  | 0.131             | 0.560              | 100     | 0.005  | 0.004             | 0.013              |
| 50+53    | 100    | 0.052  | 0.041             | 0.149              | 100     | 0.002  | 0.002             | 0.005              |
| 51       | 100    | 0.011  | 0.009             | 0.035              | 100     | 0.000  | 0.000             | 0.001              |
| 52       | 100    | 0.583  | 0.395             | 1.609              | 100     | 0.014  | 0.011             | 0.035              |
| 54       | 100    | 0.001  | 0.001             | 0.002              | 100     | 0.000  | 0.000             | 0.000              |
| 55       | 60     | 0.004  | <LOQ              | 0.012              | 40      | <LOQ   | <LOQ              | 0.001              |
| 56       | 100    | 0.049  | 0.032             | 0.156              | 100     | 0.001  | 0.001             | 0.003              |



Table S9, continued

|               |     |       |       |       |     |       |       |       |
|---------------|-----|-------|-------|-------|-----|-------|-------|-------|
| 57            | 80  | 0.001 | 0.000 | 0.002 | 0   | <LOQ  | <LOQ  | <LOQ  |
| 58            | 20  | <LOQ  | <LOQ  | 0.002 | 0   | <LOQ  | <LOQ  | <LOQ  |
| 59+62+75      | 100 | 0.016 | 0.012 | 0.051 | 100 | 0.001 | 0.000 | 0.002 |
| 60            | 100 | 0.025 | 0.016 | 0.082 | 100 | 0.001 | 0.001 | 0.002 |
| 61+70+74+76   | 100 | 0.403 | 0.266 | 1.180 | 100 | 0.008 | 0.006 | 0.021 |
| 63            | 100 | 0.005 | 0.004 | 0.014 | 100 | 0.000 | 0.000 | 0.000 |
| 64            | 100 | 0.113 | 0.077 | 0.357 | 100 | 0.003 | 0.002 | 0.009 |
| 66            | 100 | 0.118 | 0.078 | 0.354 | 100 | 0.003 | 0.002 | 0.008 |
| 67            | 100 | 0.003 | 0.002 | 0.009 | 100 | 0.000 | 0.000 | 0.000 |
| 68            | 60  | 0.000 | <LOQ  | 0.001 | 20  | <LOQ  | <LOQ  | 0.000 |
| 72            | 80  | 0.001 | 0.000 | 0.002 | 0   | <LOQ  | <LOQ  | <LOQ  |
| 73            | 0   | <LOQ  | <LOQ  | <LOQ  | 80  | 0.000 | 0.000 | 0.000 |
| 77            | 60  | 0.002 | <LOQ  | 0.007 | 0   | <LOQ  | <LOQ  | <LOQ  |
| 78            | 0   | <LOQ  | <LOQ  | <LOQ  | 0   | <LOQ  | <LOQ  | <LOQ  |
| 79            | 60  | 0.001 | <LOQ  | 0.004 | 20  | <LOQ  | <LOQ  | 0.000 |
| 80            | 0   | <LOQ  | <LOQ  | <LOQ  | 0   | <LOQ  | <LOQ  | <LOQ  |
| 81            | 0   | <LOQ  | <LOQ  | <LOQ  | 0   | <LOQ  | <LOQ  | <LOQ  |
| 82            | 100 | 0.028 | 0.014 | 0.115 | 80  | 0.001 | 0.000 | 0.002 |
| 83            | 100 | 0.014 | 0.008 | 0.050 | 80  | 0.000 | 0.000 | 0.001 |
| 84            | 100 | 0.118 | 0.062 | 0.451 | 100 | 0.002 | 0.001 | 0.007 |
| 85+116        | 100 | 0.027 | 0.017 | 0.147 | 100 | 0.001 | 0.000 | 0.002 |
| 86+97+109+119 | 100 | 0.077 | 0.047 | 0.349 | 100 | 0.002 | 0.001 | 0.004 |
| 87+125        | 100 | 0.136 | 0.070 | 0.610 | 100 | 0.003 | 0.001 | 0.009 |
| 88            | 0   | <LOQ  | <LOQ  | <LOQ  | 0   | <LOQ  | <LOQ  | <LOQ  |
| 89            | 100 | 0.003 | 0.002 | 0.010 | 80  | 0.000 | 0.000 | 0.000 |
| 90+101+113    | 100 | 0.388 | 0.220 | 1.557 | 100 | 0.008 | 0.004 | 0.024 |
| 91            | 100 | 0.052 | 0.027 | 0.193 | 100 | 0.001 | 0.001 | 0.003 |
| 92            | 100 | 0.065 | 0.036 | 0.273 | 100 | 0.001 | 0.001 | 0.004 |
| 93+100        | 100 | 0.002 | 0.002 | 0.008 | 20  | <LOQ  | <LOQ  | 0.000 |
| 94            | 100 | 0.001 | 0.001 | 0.005 | 20  | <LOQ  | <LOQ  | 0.000 |
| 95            | 100 | 0.392 | 0.206 | 1.352 | 100 | 0.008 | 0.004 | 0.023 |
| 96            | 100 | 0.002 | 0.001 | 0.009 | 100 | 0.000 | 0.000 | 0.000 |
| 98            | 20  | <LOQ  | <LOQ  | 0.000 | 0   | <LOQ  | <LOQ  | <LOQ  |
| 99            | 100 | 0.131 | 0.077 | 0.566 | 100 | 0.003 | 0.002 | 0.008 |
| 102           | 100 | 0.010 | 0.005 | 0.034 | 100 | 0.000 | 0.000 | 0.001 |
| 103           | 100 | 0.002 | 0.001 | 0.005 | 20  | <LOQ  | <LOQ  | 0.000 |
| 104           | 40  | <LOQ  | <LOQ  | 0.000 | 20  | <LOQ  | <LOQ  | 0.000 |
| 105           | 100 | 0.035 | 0.018 | 0.168 | 100 | 0.001 | 0.001 | 0.003 |
| 106           | 0   | <LOQ  | <LOQ  | <LOQ  | 0   | <LOQ  | <LOQ  | <LOQ  |
| 107+124       | 100 | 0.007 | 0.003 | 0.027 | 100 | 0.000 | 0.000 | 0.001 |
| 108           | 100 | 0.008 | 0.004 | 0.034 | 100 | 0.000 | 0.000 | 0.001 |
| 110           | 100 | 0.305 | 0.165 | 1.309 | 100 | 0.007 | 0.004 | 0.021 |
| 111           | 0   | <LOQ  | <LOQ  | <LOQ  | 0   | <LOQ  | <LOQ  | <LOQ  |
| 112           | 20  | <LOQ  | <LOQ  | 0.001 | 20  | <LOQ  | <LOQ  | 0.000 |
| 114           | 100 | 0.003 | 0.002 | 0.012 | 20  | <LOQ  | <LOQ  | 0.000 |
| 115           | 20  | <LOQ  | <LOQ  | 0.008 | 0   | <LOQ  | <LOQ  | <LOQ  |
| 117           | 100 | 0.006 | 0.003 | 0.024 | 100 | 0.000 | 0.000 | 0.000 |
| 118           | 100 | 0.140 | 0.075 | 0.678 | 100 | 0.004 | 0.002 | 0.012 |
| 120           | 0   | <LOQ  | <LOQ  | <LOQ  | 0   | <LOQ  | <LOQ  | <LOQ  |
| 121           | 0   | <LOQ  | <LOQ  | <LOQ  | 0   | <LOQ  | <LOQ  | <LOQ  |
| 122           | 60  | 0.002 | <LOQ  | 0.007 | 0   | <LOQ  | <LOQ  | <LOQ  |
| 123           | 100 | 0.002 | 0.001 | 0.010 | 0   | <LOQ  | <LOQ  | <LOQ  |
| 126           | 0   | <LOQ  | <LOQ  | <LOQ  | 0   | <LOQ  | <LOQ  | <LOQ  |
| 127           | 0   | <LOQ  | <LOQ  | <LOQ  | 0   | <LOQ  | <LOQ  | <LOQ  |

Table S9, continued

|             |     |       |       |       |     |       |       |       |
|-------------|-----|-------|-------|-------|-----|-------|-------|-------|
| 128+166     | 100 | 0.012 | 0.009 | 0.048 | 100 | 0.000 | 0.000 | 0.002 |
| 129+138+163 | 100 | 0.108 | 0.067 | 0.442 | 80  | 0.004 | 0.001 | 0.012 |
| 130         | 100 | 0.006 | 0.005 | 0.026 | 100 | 0.000 | 0.000 | 0.001 |
| 131         | 100 | 0.004 | 0.002 | 0.014 | 100 | 0.000 | 0.000 | 0.000 |
| 132         | 100 | 0.058 | 0.037 | 0.241 | 100 | 0.002 | 0.001 | 0.006 |
| 133         | 80  | 0.001 | 0.000 | 0.006 | 40  | <LOQ  | <LOQ  | 0.000 |
| 134         | 100 | 0.016 | 0.011 | 0.054 | 80  | 0.000 | 0.000 | 0.001 |
| 135+151     | 100 | 0.064 | 0.044 | 0.249 | 100 | 0.002 | 0.001 | 0.007 |
| 136         | 100 | 0.041 | 0.028 | 0.146 | 100 | 0.001 | 0.001 | 0.003 |
| 137         | 100 | 0.007 | 0.005 | 0.030 | 100 | 0.000 | 0.000 | 0.001 |
| 139+140     | 100 | 0.004 | 0.003 | 0.015 | 100 | 0.000 | 0.000 | 0.000 |
| 141         | 100 | 0.019 | 0.012 | 0.073 | 100 | 0.001 | 0.001 | 0.003 |
| 142         | 0   | <LOQ  | <LOQ  | <LOQ  | 0   | <LOQ  | <LOQ  | <LOQ  |
| 143         | 40  | <LOQ  | <LOQ  | 0.002 | 0   | <LOQ  | <LOQ  | <LOQ  |
| 144         | 100 | 0.012 | 0.007 | 0.037 | 100 | 0.000 | 0.000 | 0.001 |
| 145         | 80  | 0.000 | 0.000 | 0.001 | 0   | <LOQ  | <LOQ  | <LOQ  |
| 146         | 100 | 0.013 | 0.009 | 0.055 | 100 | 0.001 | 0.000 | 0.002 |
| 147+149     | 100 | 0.148 | 0.101 | 0.598 | 100 | 0.005 | 0.004 | 0.015 |
| 148         | 40  | <LOQ  | <LOQ  | 0.000 | 0   | <LOQ  | <LOQ  | <LOQ  |
| 150         | 100 | 0.000 | 0.000 | 0.001 | 0   | <LOQ  | <LOQ  | <LOQ  |
| 152         | 80  | 0.000 | 0.000 | 0.001 | 0   | <LOQ  | <LOQ  | <LOQ  |
| 153+168     | 100 | 0.086 | 0.057 | 0.357 | 100 | 0.004 | 0.003 | 0.011 |
| 154         | 100 | 0.002 | 0.001 | 0.006 | 60  | 0.000 | 0.000 | 0.000 |
| 155         | 100 | 0.000 | 0.000 | 0.001 | 0   | <LOQ  | <LOQ  | <LOQ  |
| 156+157     | 100 | 0.006 | 0.004 | 0.027 | 80  | 0.000 | 0.000 | 0.001 |
| 158         | 100 | 0.010 | 0.006 | 0.038 | 80  | 0.000 | 0.000 | 0.001 |
| 159         | 0   | <LOQ  | <LOQ  | <LOQ  | 40  | <LOQ  | <LOQ  | 0.000 |
| 160         | 0   | <LOQ  | <LOQ  | <LOQ  | 20  | <LOQ  | <LOQ  | 0.003 |
| 161         | 0   | <LOQ  | <LOQ  | <LOQ  | 0   | <LOQ  | <LOQ  | <LOQ  |
| 162         | 0   | <LOQ  | <LOQ  | <LOQ  | 0   | <LOQ  | <LOQ  | <LOQ  |
| 164         | 100 | 0.005 | 0.003 | 0.021 | 100 | 0.000 | 0.000 | 0.001 |
| 165         | 20  | <LOQ  | <LOQ  | 0.000 | 0   | <LOQ  | <LOQ  | <LOQ  |
| 167         | 100 | 0.002 | 0.001 | 0.008 | 80  | 0.000 | 0.000 | 0.000 |
| 169         | 0   | <LOQ  | <LOQ  | <LOQ  | 20  | <LOQ  | <LOQ  | 0.000 |
| 170         | 100 | 0.003 | 0.002 | 0.012 | 100 | 0.000 | 0.000 | 0.001 |
| 171+173     | 100 | 0.002 | 0.001 | 0.008 | 100 | 0.000 | 0.000 | 0.001 |
| 172         | 60  | 0.000 | <LOQ  | 0.003 | 40  | <LOQ  | <LOQ  | 0.000 |
| 174         | 100 | 0.005 | 0.004 | 0.022 | 100 | 0.001 | 0.000 | 0.002 |
| 175         | 80  | 0.000 | 0.000 | 0.002 | 20  | <LOQ  | <LOQ  | 0.000 |
| 176         | 100 | 0.002 | 0.001 | 0.009 | 100 | 0.000 | 0.000 | 0.001 |
| 177         | 100 | 0.003 | 0.002 | 0.014 | 80  | 0.000 | 0.000 | 0.001 |
| 178         | 100 | 0.002 | 0.001 | 0.007 | 80  | 0.000 | 0.000 | 0.001 |
| 179         | 100 | 0.009 | 0.006 | 0.033 | 100 | 0.001 | 0.000 | 0.002 |
| 180+193     | 100 | 0.008 | 0.006 | 0.034 | 100 | 0.001 | 0.001 | 0.005 |
| 181         | 20  | <LOQ  | <LOQ  | 0.001 | 0   | <LOQ  | <LOQ  | <LOQ  |
| 182         | 0   | <LOQ  | <LOQ  | <LOQ  | 20  | <LOQ  | <LOQ  | 0.000 |
| 183         | 100 | 0.006 | 0.004 | 0.021 | 100 | 0.001 | 0.000 | 0.002 |
| 184         | 40  | <LOQ  | <LOQ  | 0.000 | 0   | <LOQ  | <LOQ  | <LOQ  |
| 185         | 100 | 0.001 | 0.001 | 0.005 | 100 | 0.000 | 0.000 | 0.000 |
| 186         | 0   | <LOQ  | <LOQ  | <LOQ  | 0   | <LOQ  | <LOQ  | <LOQ  |
| 187         | 100 | 0.013 | 0.009 | 0.048 | 100 | 0.001 | 0.001 | 0.006 |
| 188         | 0   | <LOQ  | <LOQ  | <LOQ  | 0   | <LOQ  | <LOQ  | <LOQ  |
| 189         | 0   | <LOQ  | <LOQ  | <LOQ  | 0   | <LOQ  | <LOQ  | <LOQ  |
| 190         | 100 | 0.001 | 0.001 | 0.003 | 40  | <LOQ  | <LOQ  | 0.000 |

**Table S9, continued**

|         |     |       |       |       |     |       |       |       |
|---------|-----|-------|-------|-------|-----|-------|-------|-------|
| 191     | 60  | 0.000 | <LOQ  | 0.001 | 0   | <LOQ  | <LOQ  | <LOQ  |
| 192     | 0   | <LOQ  | <LOQ  | <LOQ  | 0   | <LOQ  | <LOQ  | <LOQ  |
| 194     | 20  | <LOQ  | <LOQ  | 0.002 | 60  | 0.001 | 0.000 | 0.001 |
| 195     | 40  | <LOQ  | <LOQ  | 0.001 | 40  | <LOQ  | <LOQ  | 0.000 |
| 196     | 100 | 0.001 | 0.000 | 0.003 | 100 | 0.000 | 0.000 | 0.001 |
| 197     | 0   | <LOQ  | <LOQ  | <LOQ  | 0   | <LOQ  | <LOQ  | <LOQ  |
| 198+199 | 100 | 0.002 | 0.002 | 0.008 | 100 | 0.001 | 0.000 | 0.003 |
| 200     | 60  | 0.001 | <LOQ  | 0.003 | 20  | <LOQ  | <LOQ  | 0.000 |
| 201     | 100 | 0.001 | 0.001 | 0.004 | 100 | 0.000 | 0.000 | 0.001 |
| 202     | 100 | 0.002 | 0.001 | 0.007 | 100 | 0.000 | 0.000 | 0.002 |
| 203     | 100 | 0.002 | 0.001 | 0.005 | 100 | 0.001 | 0.000 | 0.002 |
| 205     | 0   | <LOQ  | <LOQ  | <LOQ  | 0   | <LOQ  | <LOQ  | <LOQ  |
| 206     | 20  | <LOQ  | <LOQ  | 0.002 | 80  | 0.000 | 0.000 | 0.002 |
| 207     | 20  | <LOQ  | <LOQ  | 0.001 | 60  | 0.000 | <LOQ  | 0.000 |
| 208     | 100 | 0.001 | 0.000 | 0.001 | 100 | 0.000 | 0.000 | 0.001 |
| 209     | 0   | <LOQ  | <LOQ  | <LOQ  | 0   | <LOQ  | <LOQ  | <LOQ  |

**Table S10** EC School 2 indoor and outdoor PCB concentration summary data: percent detection (%) and median, 5<sup>th</sup> percentile, and 95<sup>th</sup> percentile (ng/m<sup>3</sup>)

| PCB      | Indoor |         |                   |                    | Outdoor |        |                   |                    |
|----------|--------|---------|-------------------|--------------------|---------|--------|-------------------|--------------------|
|          | %Det   | Median  | 5 <sup>th</sup> % | 95 <sup>th</sup> % | %Det    | Median | 5 <sup>th</sup> % | 95 <sup>th</sup> % |
| ΣPCBs    | 100    | 111.829 | 76.719            | 187.923            | 100     | 0.584  | 0.290             | 2.378              |
| 1        | 100    | 2.538   | 1.446             | 7.225              | 100     | 0.040  | 0.023             | 0.243              |
| 2        | 100    | 0.329   | 0.194             | 0.822              | 100     | 0.005  | 0.003             | 0.024              |
| 3        | 100    | 1.893   | 1.159             | 5.045              | 100     | 0.025  | 0.015             | 0.139              |
| 4        | 100    | 1.090   | 0.492             | 3.298              | 100     | 0.020  | 0.010             | 0.114              |
| 5        | 100    | 0.150   | 0.067             | 0.393              | 25      | <LOQ   | <LOQ              | 0.009              |
| 6        | 100    | 0.704   | 0.330             | 1.857              | 100     | 0.010  | 0.004             | 0.051              |
| 7        | 100    | 0.249   | 0.114             | 0.657              | 100     | 0.003  | 0.001             | 0.016              |
| 8        | 100    | 2.645   | 1.312             | 7.283              | 100     | 0.039  | 0.016             | 0.189              |
| 9        | 100    | 0.274   | 0.125             | 0.711              | 100     | 0.004  | 0.002             | 0.019              |
| 10       | 100    | 0.070   | 0.029             | 0.205              | 100     | 0.001  | 0.001             | 0.006              |
| 11       | 100    | 0.335   | 0.182             | 0.633              | 100     | 0.008  | 0.003             | 0.035              |
| 12+13    | 100    | 0.272   | 0.127             | 0.687              | 92      | 0.004  | 0.001             | 0.022              |
| 14       | 100    | 0.001   | 0.000             | 0.003              | 50      | 0.000  | <LOQ              | 0.000              |
| 15       | 100    | 0.810   | 0.409             | 2.044              | 100     | 0.012  | 0.004             | 0.072              |
| 16       | 100    | 0.767   | 0.395             | 1.448              | 100     | 0.010  | 0.005             | 0.036              |
| 17       | 100    | 0.703   | 0.368             | 1.296              | 100     | 0.010  | 0.005             | 0.034              |
| 18+30    | 100    | 1.553   | 0.829             | 2.923              | 100     | 0.022  | 0.011             | 0.079              |
| 19       | 100    | 0.154   | 0.078             | 0.316              | 100     | 0.003  | 0.001             | 0.008              |
| 20+28    | 100    | 1.655   | 0.897             | 2.814              | 100     | 0.021  | 0.010             | 0.071              |
| 21+33    | 100    | 1.117   | 0.602             | 1.953              | 100     | 0.014  | 0.006             | 0.046              |
| 22       | 100    | 0.645   | 0.337             | 1.101              | 100     | 0.007  | 0.004             | 0.027              |
| 23       | 100    | 0.002   | 0.001             | 0.004              | 58      | 0.000  | <LOQ              | 0.000              |
| 24       | 100    | 0.021   | 0.011             | 0.041              | 100     | 0.000  | 0.000             | 0.001              |
| 25       | 100    | 0.139   | 0.070             | 0.254              | 92      | 0.002  | 0.001             | 0.006              |
| 26+29    | 100    | 0.294   | 0.150             | 0.485              | 100     | 0.004  | 0.002             | 0.013              |
| 27       | 100    | 0.090   | 0.047             | 0.168              | 100     | 0.001  | 0.001             | 0.004              |
| 31       | 100    | 1.726   | 0.959             | 2.885              | 100     | 0.020  | 0.009             | 0.067              |
| 32       | 100    | 0.430   | 0.226             | 0.771              | 100     | 0.006  | 0.003             | 0.020              |
| 34       | 100    | 0.005   | 0.003             | 0.008              | 92      | 0.000  | 0.000             | 0.000              |
| 35       | 100    | 0.010   | 0.004             | 0.016              | 67      | 0.000  | <LOQ              | 0.001              |
| 36       | 0      | <LOQ    | <LOQ              | <LOQ               | 17      | <LOQ   | <LOQ              | 0.000              |
| 37       | 100    | 0.240   | 0.132             | 0.398              | 92      | 0.003  | 0.001             | 0.014              |
| 38       | 100    | 0.003   | 0.002             | 0.006              | 17      | <LOQ   | <LOQ              | 0.000              |
| 39       | 8      | <LOQ    | <LOQ              | 0.002              | 17      | <LOQ   | <LOQ              | 0.000              |
| 40+71    | 100    | 0.756   | 0.570             | 1.153              | 100     | 0.006  | 0.003             | 0.018              |
| 41       | 100    | 0.128   | 0.086             | 0.205              | 100     | 0.002  | 0.001             | 0.004              |
| 42       | 100    | 0.464   | 0.352             | 0.741              | 100     | 0.004  | 0.002             | 0.012              |
| 43       | 100    | 0.083   | 0.061             | 0.129              | 92      | 0.001  | 0.000             | 0.002              |
| 44+47+65 | 100    | 4.332   | 3.307             | 6.758              | 100     | 0.018  | 0.009             | 0.060              |
| 45       | 100    | 0.275   | 0.196             | 0.437              | 100     | 0.003  | 0.002             | 0.009              |
| 46       | 100    | 0.095   | 0.065             | 0.155              | 100     | 0.001  | 0.001             | 0.003              |
| 48       | 100    | 0.375   | 0.265             | 0.577              | 100     | 0.004  | 0.002             | 0.010              |
| 49+69    | 100    | 3.012   | 1.568             | 4.673              | 100     | 0.012  | 0.006             | 0.037              |
| 50+53    | 100    | 0.361   | 0.259             | 0.564              | 100     | 0.003  | 0.002             | 0.008              |
| 51       | 100    | 0.076   | 0.049             | 0.143              | 100     | 0.001  | 0.001             | 0.002              |
| 52       | 100    | 12.663  | 9.747             | 19.778             | 100     | 0.039  | 0.019             | 0.131              |
| 54       | 100    | 0.003   | 0.002             | 0.004              | 83      | 0.000  | <LOQ              | 0.000              |
| 55       | 83     | 0.042   | <LOQ              | 0.065              | 58      | 0.000  | <LOQ              | 0.002              |
| 56       | 100    | 0.650   | 0.531             | 0.959              | 100     | 0.003  | 0.002             | 0.014              |

**Table S10, continued**

|               |     |       |       |        |     |       |       |       |
|---------------|-----|-------|-------|--------|-----|-------|-------|-------|
| 57            | 100 | 0.003 | 0.002 | 0.005  | 33  | <LOQ  | <LOQ  | 0.000 |
| 58            | 42  | <LOQ  | <LOQ  | 0.068  | 0   | <LOQ  | <LOQ  | <LOQ  |
| 59+62+75      | 100 | 0.099 | 0.073 | 0.148  | 100 | 0.001 | 0.001 | 0.004 |
| 60            | 100 | 0.311 | 0.253 | 0.467  | 100 | 0.002 | 0.001 | 0.008 |
| 61+70+74+76   | 100 | 7.044 | 5.805 | 10.462 | 100 | 0.022 | 0.011 | 0.090 |
| 63            | 100 | 0.062 | 0.047 | 0.091  | 92  | 0.000 | 0.000 | 0.001 |
| 64            | 100 | 1.383 | 1.079 | 2.114  | 100 | 0.007 | 0.004 | 0.024 |
| 66            | 100 | 1.658 | 1.331 | 2.385  | 100 | 0.008 | 0.004 | 0.031 |
| 67            | 100 | 0.022 | 0.014 | 0.031  | 92  | 0.000 | 0.000 | 0.001 |
| 68            | 100 | 0.009 | 0.003 | 0.013  | 25  | <LOQ  | <LOQ  | 0.000 |
| 72            | 100 | 0.004 | 0.002 | 0.006  | 33  | <LOQ  | <LOQ  | 0.000 |
| 73            | 0   | <LOQ  | <LOQ  | <LOQ   | 58  | 0.000 | <LOQ  | 0.000 |
| 77            | 100 | 0.027 | 0.016 | 0.033  | 67  | 0.000 | <LOQ  | 0.002 |
| 78            | 0   | <LOQ  | <LOQ  | <LOQ   | 0   | <LOQ  | <LOQ  | <LOQ  |
| 79            | 100 | 0.018 | 0.014 | 0.032  | 25  | <LOQ  | <LOQ  | 0.000 |
| 80            | 0   | <LOQ  | <LOQ  | <LOQ   | 0   | <LOQ  | <LOQ  | <LOQ  |
| 81            | 0   | <LOQ  | <LOQ  | <LOQ   | 0   | <LOQ  | <LOQ  | <LOQ  |
| 82            | 100 | 0.621 | 0.408 | 0.990  | 100 | 0.001 | 0.001 | 0.006 |
| 83            | 92  | 0.254 | 0.077 | 0.439  | 92  | 0.001 | 0.000 | 0.003 |
| 84            | 100 | 2.406 | 1.574 | 3.972  | 100 | 0.005 | 0.003 | 0.022 |
| 85+116        | 100 | 0.757 | 0.491 | 1.198  | 100 | 0.002 | 0.001 | 0.006 |
| 86+97+109+119 | 100 | 1.812 | 1.170 | 2.916  | 100 | 0.004 | 0.002 | 0.016 |
| 87+125        | 100 | 3.176 | 2.006 | 4.981  | 100 | 0.006 | 0.003 | 0.028 |
| 88            | 0   | <LOQ  | <LOQ  | <LOQ   | 8   | <LOQ  | <LOQ  | 0.000 |
| 89            | 100 | 0.046 | 0.028 | 0.073  | 100 | 0.000 | 0.000 | 0.001 |
| 90+101+113    | 100 | 8.357 | 5.334 | 13.204 | 100 | 0.018 | 0.008 | 0.079 |
| 91            | 100 | 1.060 | 0.688 | 1.832  | 100 | 0.002 | 0.001 | 0.010 |
| 92            | 100 | 1.476 | 0.926 | 2.322  | 100 | 0.003 | 0.001 | 0.013 |
| 93+100        | 100 | 0.042 | 0.025 | 0.066  | 67  | 0.000 | <LOQ  | 0.000 |
| 94            | 100 | 0.025 | 0.015 | 0.042  | 92  | 0.000 | 0.000 | 0.000 |
| 95            | 100 | 8.357 | 5.202 | 13.620 | 100 | 0.020 | 0.009 | 0.077 |
| 96            | 100 | 0.041 | 0.026 | 0.074  | 100 | 0.000 | 0.000 | 0.001 |
| 98            | 0   | <LOQ  | <LOQ  | <LOQ   | 8   | <LOQ  | <LOQ  | 0.000 |
| 99            | 100 | 2.967 | 1.035 | 4.913  | 100 | 0.006 | 0.003 | 0.027 |
| 102           | 100 | 0.188 | 0.115 | 0.321  | 100 | 0.001 | 0.000 | 0.002 |
| 103           | 100 | 0.035 | 0.021 | 0.057  | 83  | 0.000 | <LOQ  | 0.001 |
| 104           | 83  | 0.000 | <LOQ  | 0.000  | 8   | <LOQ  | <LOQ  | 0.000 |
| 105           | 100 | 1.014 | 0.674 | 1.463  | 100 | 0.002 | 0.001 | 0.010 |
| 106           | 8   | <LOQ  | <LOQ  | 1.331  | 8   | <LOQ  | <LOQ  | 0.000 |
| 107+124       | 100 | 0.157 | 0.103 | 0.239  | 92  | 0.000 | 0.000 | 0.001 |
| 108           | 100 | 0.205 | 0.138 | 0.311  | 92  | 0.000 | 0.000 | 0.002 |
| 110           | 100 | 6.859 | 4.591 | 10.828 | 100 | 0.014 | 0.006 | 0.067 |
| 111           | 0   | <LOQ  | <LOQ  | <LOQ   | 0   | <LOQ  | <LOQ  | <LOQ  |
| 112           | 8   | <LOQ  | <LOQ  | 1.395  | 17  | <LOQ  | <LOQ  | 0.000 |
| 114           | 100 | 0.081 | 0.048 | 0.107  | 42  | <LOQ  | <LOQ  | 0.001 |
| 115           | 0   | <LOQ  | <LOQ  | <LOQ   | 8   | <LOQ  | <LOQ  | 0.000 |
| 117           | 100 | 0.145 | 0.094 | 0.222  | 92  | 0.000 | 0.000 | 0.001 |
| 118           | 100 | 4.091 | 1.290 | 5.887  | 100 | 0.008 | 0.003 | 0.037 |
| 120           | 8   | <LOQ  | <LOQ  | 0.001  | 0   | <LOQ  | <LOQ  | <LOQ  |
| 121           | 0   | <LOQ  | <LOQ  | <LOQ   | 17  | <LOQ  | <LOQ  | 0.000 |
| 122           | 100 | 0.046 | 0.030 | 0.065  | 17  | <LOQ  | <LOQ  | 0.000 |
| 123           | 100 | 0.054 | 0.034 | 0.082  | 33  | <LOQ  | <LOQ  | 0.001 |
| 126           | 0   | <LOQ  | <LOQ  | <LOQ   | 0   | <LOQ  | <LOQ  | <LOQ  |
| 127           | 0   | <LOQ  | <LOQ  | <LOQ   | 0   | <LOQ  | <LOQ  | <LOQ  |

**Table S10, continued**

|             |     |       |       |       |     |       |       |       |
|-------------|-----|-------|-------|-------|-----|-------|-------|-------|
| 128+166     | 100 | 0.287 | 0.217 | 0.387 | 100 | 0.001 | 0.000 | 0.004 |
| 129+138+163 | 100 | 2.867 | 2.125 | 3.833 | 100 | 0.009 | 0.004 | 0.039 |
| 130         | 100 | 0.165 | 0.123 | 0.221 | 100 | 0.001 | 0.000 | 0.002 |
| 131         | 100 | 0.085 | 0.060 | 0.116 | 92  | 0.000 | 0.000 | 0.001 |
| 132         | 100 | 1.439 | 1.078 | 1.951 | 100 | 0.005 | 0.002 | 0.018 |
| 133         | 100 | 0.033 | 0.026 | 0.049 | 58  | 0.000 | <LOQ  | 0.001 |
| 134         | 100 | 0.338 | 0.250 | 0.453 | 100 | 0.001 | 0.000 | 0.004 |
| 135+151     | 100 | 1.141 | 0.862 | 1.674 | 100 | 0.004 | 0.002 | 0.017 |
| 136         | 100 | 0.727 | 0.549 | 1.019 | 100 | 0.002 | 0.001 | 0.009 |
| 137         | 100 | 0.182 | 0.136 | 0.263 | 100 | 0.001 | 0.000 | 0.002 |
| 139+140     | 100 | 0.099 | 0.073 | 0.144 | 92  | 0.000 | 0.000 | 0.001 |
| 141         | 100 | 0.448 | 0.347 | 0.636 | 100 | 0.002 | 0.001 | 0.007 |
| 142         | 17  | <LOQ  | <LOQ  | 0.002 | 0   | <LOQ  | <LOQ  | <LOQ  |
| 143         | 50  | 0.003 | <LOQ  | 0.021 | 33  | <LOQ  | <LOQ  | 0.000 |
| 144         | 100 | 0.198 | 0.147 | 0.288 | 100 | 0.001 | 0.000 | 0.003 |
| 145         | 100 | 0.004 | 0.003 | 0.005 | 33  | <LOQ  | <LOQ  | 0.000 |
| 146         | 100 | 0.324 | 0.254 | 0.476 | 100 | 0.001 | 0.001 | 0.005 |
| 147+149     | 100 | 3.129 | 2.316 | 4.355 | 100 | 0.010 | 0.005 | 0.043 |
| 148         | 92  | 0.002 | 0.001 | 0.003 | 17  | <LOQ  | <LOQ  | 0.000 |
| 150         | 100 | 0.006 | 0.004 | 0.008 | 42  | <LOQ  | <LOQ  | 0.000 |
| 152         | 100 | 0.006 | 0.004 | 0.009 | 42  | <LOQ  | <LOQ  | 0.000 |
| 153+168     | 100 | 2.073 | 1.634 | 2.927 | 100 | 0.007 | 0.003 | 0.032 |
| 154         | 100 | 0.032 | 0.024 | 0.048 | 75  | 0.000 | <LOQ  | 0.000 |
| 155         | 92  | 0.000 | 0.000 | 0.000 | 8   | <LOQ  | <LOQ  | 0.000 |
| 156+157     | 100 | 0.133 | 0.091 | 0.176 | 92  | 0.001 | 0.000 | 0.002 |
| 158         | 100 | 0.270 | 0.208 | 0.371 | 100 | 0.001 | 0.000 | 0.004 |
| 159         | 92  | 0.002 | 0.001 | 0.003 | 8   | <LOQ  | <LOQ  | 0.000 |
| 160         | 0   | <LOQ  | <LOQ  | <LOQ  | 0   | <LOQ  | <LOQ  | <LOQ  |
| 161         | 0   | <LOQ  | <LOQ  | <LOQ  | 8   | <LOQ  | <LOQ  | 0.000 |
| 162         | 100 | 0.004 | 0.003 | 0.006 | 0   | <LOQ  | <LOQ  | <LOQ  |
| 164         | 100 | 0.134 | 0.100 | 0.187 | 100 | 0.001 | 0.000 | 0.002 |
| 165         | 0   | <LOQ  | <LOQ  | <LOQ  | 0   | <LOQ  | <LOQ  | <LOQ  |
| 167         | 100 | 0.048 | 0.035 | 0.064 | 92  | 0.000 | 0.000 | 0.001 |
| 169         | 0   | <LOQ  | <LOQ  | <LOQ  | 0   | <LOQ  | <LOQ  | <LOQ  |
| 170         | 100 | 0.043 | 0.028 | 0.054 | 100 | 0.001 | 0.000 | 0.002 |
| 171+173     | 100 | 0.040 | 0.026 | 0.049 | 100 | 0.000 | 0.000 | 0.001 |
| 172         | 100 | 0.010 | 0.007 | 0.013 | 75  | 0.000 | <LOQ  | 0.001 |
| 174         | 100 | 0.077 | 0.050 | 0.106 | 100 | 0.001 | 0.000 | 0.003 |
| 175         | 100 | 0.007 | 0.004 | 0.009 | 25  | <LOQ  | <LOQ  | 0.000 |
| 176         | 100 | 0.028 | 0.019 | 0.038 | 100 | 0.000 | 0.000 | 0.001 |
| 177         | 100 | 0.053 | 0.034 | 0.069 | 92  | 0.001 | 0.000 | 0.002 |
| 178         | 100 | 0.021 | 0.015 | 0.030 | 92  | 0.000 | 0.000 | 0.001 |
| 179         | 100 | 0.077 | 0.052 | 0.107 | 100 | 0.001 | 0.000 | 0.003 |
| 180+193     | 100 | 0.103 | 0.069 | 0.138 | 100 | 0.002 | 0.001 | 0.006 |
| 181         | 100 | 0.004 | 0.002 | 0.005 | 25  | <LOQ  | <LOQ  | 0.000 |
| 182         | 100 | 0.002 | 0.001 | 0.002 | 17  | <LOQ  | <LOQ  | 0.000 |
| 183         | 100 | 0.075 | 0.052 | 0.104 | 100 | 0.001 | 0.000 | 0.003 |
| 184         | 100 | 0.000 | 0.000 | 0.000 | 17  | <LOQ  | <LOQ  | 0.000 |
| 185         | 100 | 0.010 | 0.006 | 0.014 | 83  | 0.000 | <LOQ  | 0.001 |
| 186         | 42  | <LOQ  | <LOQ  | 0.000 | 0   | <LOQ  | <LOQ  | <LOQ  |
| 187         | 100 | 0.117 | 0.080 | 0.168 | 100 | 0.002 | 0.001 | 0.007 |
| 188         | 83  | 0.000 | <LOQ  | 0.000 | 17  | <LOQ  | <LOQ  | 0.000 |
| 189         | 50  | 0.000 | <LOQ  | 0.001 | 0   | <LOQ  | <LOQ  | <LOQ  |
| 190         | 100 | 0.008 | 0.005 | 0.009 | 67  | 0.000 | <LOQ  | 0.000 |

**Table S10, continued**

|         |     |       |       |       |     |       |       |       |
|---------|-----|-------|-------|-------|-----|-------|-------|-------|
| 191     | 100 | 0.003 | 0.002 | 0.004 | 42  | <LOQ  | <LOQ  | 0.000 |
| 192     | 0   | <LOQ  | <LOQ  | <LOQ  | 0   | <LOQ  | <LOQ  | <LOQ  |
| 194     | 83  | 0.002 | <LOQ  | 0.003 | 83  | 0.000 | <LOQ  | 0.001 |
| 195     | 100 | 0.002 | 0.001 | 0.002 | 50  | 0.000 | <LOQ  | 0.000 |
| 196     | 100 | 0.003 | 0.002 | 0.005 | 100 | 0.000 | 0.000 | 0.001 |
| 197     | 83  | 0.001 | <LOQ  | 0.002 | 8   | <LOQ  | <LOQ  | 0.000 |
| 198+199 | 100 | 0.008 | 0.005 | 0.011 | 100 | 0.001 | 0.001 | 0.002 |
| 200     | 100 | 0.003 | 0.002 | 0.004 | 50  | 0.000 | <LOQ  | 0.000 |
| 201     | 100 | 0.003 | 0.002 | 0.005 | 100 | 0.000 | 0.000 | 0.001 |
| 202     | 100 | 0.006 | 0.004 | 0.009 | 100 | 0.000 | 0.000 | 0.001 |
| 203     | 100 | 0.005 | 0.003 | 0.007 | 100 | 0.001 | 0.000 | 0.002 |
| 205     | 0   | <LOQ  | <LOQ  | <LOQ  | 0   | <LOQ  | <LOQ  | <LOQ  |
| 206     | 67  | 0.001 | <LOQ  | 0.003 | 92  | 0.001 | 0.000 | 0.001 |
| 207     | 75  | 0.001 | <LOQ  | 0.001 | 92  | 0.000 | 0.000 | 0.000 |
| 208     | 100 | 0.002 | 0.001 | 0.002 | 100 | 0.000 | 0.000 | 0.001 |
| 209     | 25  | <LOQ  | <LOQ  | 0.003 | 17  | <LOQ  | <LOQ  | 0.000 |

**Table S11** EC School 3 indoor and outdoor PCB concentration summary data: percent detection (%) and median, 5<sup>th</sup> percentile, and 95<sup>th</sup> percentile (ng/m<sup>3</sup>)

| PCB      | Indoor |        |                   |                    | Outdoor |        |                   |                    |
|----------|--------|--------|-------------------|--------------------|---------|--------|-------------------|--------------------|
|          | %Det   | Median | 5 <sup>th</sup> % | 95 <sup>th</sup> % | %Det    | Median | 5 <sup>th</sup> % | 95 <sup>th</sup> % |
| ΣPCBs    | 100    | 2.045  | 0.698             | 5.136              | 100     | 0.183  | 0.095             | 0.496              |
| 1        | 100    | 0.025  | 0.011             | 0.085              | 92      | 0.004  | 0.002             | 0.029              |
| 2        | 100    | 0.005  | 0.003             | 0.012              | 100     | 0.001  | 0.001             | 0.003              |
| 3        | 100    | 0.021  | 0.014             | 0.054              | 92      | 0.004  | 0.001             | 0.006              |
| 4        | 100    | 0.034  | 0.011             | 0.163              | 100     | 0.008  | 0.003             | 0.038              |
| 5        | 0      | <LOQ   | <LOQ              | <LOQ               | 0       | <LOQ   | <LOQ              | <LOQ               |
| 6        | 100    | 0.012  | 0.006             | 0.058              | 100     | 0.002  | 0.001             | 0.007              |
| 7        | 100    | 0.003  | 0.001             | 0.013              | 100     | 0.000  | 0.000             | 0.001              |
| 8        | 100    | 0.055  | 0.024             | 0.258              | 100     | 0.008  | 0.004             | 0.028              |
| 9        | 100    | 0.004  | 0.002             | 0.018              | 100     | 0.001  | 0.000             | 0.002              |
| 10       | 92     | 0.001  | 0.000             | 0.006              | 100     | 0.000  | 0.000             | 0.001              |
| 11       | 100    | 0.306  | 0.109             | 0.873              | 100     | 0.005  | 0.002             | 0.012              |
| 12+13    | 50     | 0.003  | <LOQ              | 0.017              | 0       | <LOQ   | <LOQ              | <LOQ               |
| 14       | 75     | 0.001  | <LOQ              | 0.003              | 25      | <LOQ   | <LOQ              | 0.000              |
| 15       | 100    | 0.015  | 0.006             | 0.061              | 100     | 0.002  | 0.001             | 0.004              |
| 16       | 100    | 0.037  | 0.012             | 0.115              | 100     | 0.005  | 0.002             | 0.011              |
| 17       | 100    | 0.032  | 0.013             | 0.106              | 100     | 0.005  | 0.002             | 0.011              |
| 18+30    | 100    | 0.077  | 0.029             | 0.256              | 100     | 0.012  | 0.006             | 0.029              |
| 19       | 100    | 0.011  | 0.003             | 0.028              | 100     | 0.002  | 0.001             | 0.006              |
| 20+28    | 100    | 0.071  | 0.026             | 0.217              | 100     | 0.008  | 0.004             | 0.017              |
| 21+33    | 100    | 0.045  | 0.015             | 0.134              | 100     | 0.004  | 0.002             | 0.009              |
| 22       | 100    | 0.025  | 0.009             | 0.077              | 100     | 0.003  | 0.001             | 0.006              |
| 23       | 0      | <LOQ   | <LOQ              | <LOQ               | 0       | <LOQ   | <LOQ              | <LOQ               |
| 24       | 83     | 0.001  | <LOQ              | 0.003              | 83      | 0.000  | <LOQ              | 0.000              |
| 25       | 58     | 0.005  | <LOQ              | 0.014              | 25      | <LOQ   | <LOQ              | 0.001              |
| 26+29    | 100    | 0.012  | 0.005             | 0.034              | 100     | 0.002  | 0.001             | 0.003              |
| 27       | 100    | 0.004  | 0.002             | 0.012              | 100     | 0.001  | 0.000             | 0.002              |
| 31       | 100    | 0.075  | 0.027             | 0.218              | 100     | 0.007  | 0.004             | 0.016              |
| 32       | 100    | 0.019  | 0.009             | 0.053              | 100     | 0.003  | 0.001             | 0.007              |
| 34       | 8      | <LOQ   | <LOQ              | 0.000              | 25      | <LOQ   | <LOQ              | 0.000              |
| 35       | 50     | 0.000  | <LOQ              | 0.004              | 42      | <LOQ   | <LOQ              | 0.000              |
| 36       | 0      | <LOQ   | <LOQ              | <LOQ               | 0       | <LOQ   | <LOQ              | <LOQ               |
| 37       | 75     | 0.005  | <LOQ              | 0.024              | 83      | 0.001  | <LOQ              | 0.002              |
| 38       | 0      | <LOQ   | <LOQ              | <LOQ               | 0       | <LOQ   | <LOQ              | <LOQ               |
| 39       | 0      | <LOQ   | <LOQ              | <LOQ               | 0       | <LOQ   | <LOQ              | <LOQ               |
| 40+71    | 100    | 0.019  | 0.008             | 0.066              | 100     | 0.002  | 0.001             | 0.007              |
| 41       | 92     | 0.006  | 0.001             | 0.025              | 100     | 0.001  | 0.000             | 0.002              |
| 42       | 100    | 0.014  | 0.006             | 0.041              | 100     | 0.002  | 0.001             | 0.005              |
| 43       | 92     | 0.003  | 0.001             | 0.008              | 100     | 0.000  | 0.000             | 0.001              |
| 44+47+65 | 100    | 0.074  | 0.027             | 0.211              | 100     | 0.007  | 0.004             | 0.017              |
| 45       | 100    | 0.014  | 0.005             | 0.036              | 100     | 0.002  | 0.001             | 0.004              |
| 46       | 100    | 0.006  | 0.002             | 0.012              | 100     | 0.001  | 0.000             | 0.002              |
| 48       | 100    | 0.019  | 0.006             | 0.079              | 100     | 0.002  | 0.001             | 0.004              |
| 49+69    | 100    | 0.044  | 0.011             | 0.127              | 100     | 0.004  | 0.002             | 0.011              |
| 50+53    | 100    | 0.016  | 0.005             | 0.033              | 100     | 0.002  | 0.001             | 0.004              |
| 51       | 100    | 0.006  | 0.002             | 0.013              | 100     | 0.000  | 0.000             | 0.001              |
| 52       | 83     | 0.122  | <LOQ              | 0.410              | 100     | 0.011  | 0.006             | 0.026              |
| 54       | 83     | 0.000  | <LOQ              | 0.001              | 83      | 0.000  | <LOQ              | 0.000              |
| 55       | 17     | <LOQ   | <LOQ              | 0.032              | 17      | <LOQ   | <LOQ              | 0.000              |
| 56       | 100    | 0.009  | 0.003             | 0.029              | 100     | 0.001  | 0.001             | 0.003              |



**Table S11, continued**

|               |     |       |       |       |     |       |       |       |
|---------------|-----|-------|-------|-------|-----|-------|-------|-------|
| 57            | 8   | <LOQ  | <LOQ  | 0.001 | 0   | <LOQ  | <LOQ  | <LOQ  |
| 58            | 0   | <LOQ  | <LOQ  | <LOQ  | 0   | <LOQ  | <LOQ  | <LOQ  |
| 59+62+75      | 100 | 0.006 | 0.002 | 0.069 | 100 | 0.001 | 0.000 | 0.001 |
| 60            | 100 | 0.008 | 0.003 | 0.022 | 100 | 0.001 | 0.000 | 0.002 |
| 61+70+74+76   | 100 | 0.068 | 0.018 | 0.204 | 100 | 0.006 | 0.003 | 0.015 |
| 63            | 92  | 0.002 | 0.000 | 0.003 | 100 | 0.000 | 0.000 | 0.000 |
| 64            | 100 | 0.033 | 0.011 | 0.075 | 100 | 0.003 | 0.001 | 0.007 |
| 66            | 100 | 0.032 | 0.010 | 0.124 | 100 | 0.002 | 0.001 | 0.006 |
| 67            | 83  | 0.001 | <LOQ  | 0.002 | 92  | 0.000 | 0.000 | 0.000 |
| 68            | 67  | 0.001 | <LOQ  | 0.002 | 8   | <LOQ  | <LOQ  | 0.000 |
| 72            | 8   | <LOQ  | <LOQ  | 0.026 | 8   | <LOQ  | <LOQ  | 0.000 |
| 73            | 42  | <LOQ  | <LOQ  | 0.285 | 58  | 0.000 | <LOQ  | 0.000 |
| 77            | 8   | <LOQ  | <LOQ  | 0.001 | 42  | <LOQ  | <LOQ  | 0.000 |
| 78            | 0   | <LOQ  | <LOQ  | <LOQ  | 0   | <LOQ  | <LOQ  | <LOQ  |
| 79            | 8   | <LOQ  | <LOQ  | 0.001 | 8   | <LOQ  | <LOQ  | 0.000 |
| 80            | 8   | <LOQ  | <LOQ  | 0.006 | 0   | <LOQ  | <LOQ  | <LOQ  |
| 81            | 8   | <LOQ  | <LOQ  | 0.000 | 0   | <LOQ  | <LOQ  | <LOQ  |
| 82            | 75  | 0.005 | <LOQ  | 0.012 | 33  | <LOQ  | <LOQ  | 0.001 |
| 83            | 75  | 0.003 | <LOQ  | 0.008 | 67  | 0.000 | <LOQ  | 0.001 |
| 84            | 100 | 0.026 | 0.006 | 0.062 | 100 | 0.001 | 0.001 | 0.004 |
| 85+116        | 100 | 0.007 | 0.001 | 0.014 | 100 | 0.001 | 0.000 | 0.001 |
| 86+97+109+119 | 100 | 0.016 | 0.004 | 0.038 | 100 | 0.001 | 0.000 | 0.004 |
| 87+125        | 100 | 0.024 | 0.005 | 0.054 | 92  | 0.002 | 0.000 | 0.004 |
| 88            | 0   | <LOQ  | <LOQ  | <LOQ  | 8   | <LOQ  | <LOQ  | 0.000 |
| 89            | 67  | 0.001 | <LOQ  | 0.002 | 67  | 0.000 | <LOQ  | 0.000 |
| 90+101+113    | 100 | 0.075 | 0.018 | 0.174 | 100 | 0.004 | 0.002 | 0.012 |
| 91            | 100 | 0.013 | 0.003 | 0.029 | 100 | 0.001 | 0.000 | 0.002 |
| 92            | 100 | 0.013 | 0.003 | 0.031 | 100 | 0.001 | 0.000 | 0.002 |
| 93+100        | 67  | 0.001 | <LOQ  | 0.002 | 42  | <LOQ  | <LOQ  | 0.000 |
| 94            | 58  | 0.000 | <LOQ  | 0.001 | 58  | 0.000 | <LOQ  | 0.000 |
| 95            | 100 | 0.099 | 0.024 | 0.232 | 100 | 0.005 | 0.002 | 0.013 |
| 96            | 100 | 0.001 | 0.000 | 0.002 | 100 | 0.000 | 0.000 | 0.000 |
| 98            | 8   | <LOQ  | <LOQ  | 0.000 | 17  | <LOQ  | <LOQ  | 0.000 |
| 99            | 100 | 0.028 | 0.007 | 0.065 | 100 | 0.002 | 0.001 | 0.005 |
| 102           | 100 | 0.003 | 0.001 | 0.006 | 100 | 0.000 | 0.000 | 0.001 |
| 103           | 67  | 0.001 | <LOQ  | 0.002 | 33  | <LOQ  | <LOQ  | 0.000 |
| 104           | 8   | <LOQ  | <LOQ  | 0.000 | 8   | <LOQ  | <LOQ  | 0.000 |
| 105           | 92  | 0.006 | 0.001 | 0.013 | 100 | 0.001 | 0.000 | 0.002 |
| 106           | 0   | <LOQ  | <LOQ  | <LOQ  | 0   | <LOQ  | <LOQ  | <LOQ  |
| 107+124       | 58  | 0.001 | <LOQ  | 0.002 | 58  | 0.000 | <LOQ  | 0.000 |
| 108           | 67  | 0.001 | <LOQ  | 0.003 | 83  | 0.000 | <LOQ  | 0.000 |
| 110           | 100 | 0.051 | 0.011 | 0.130 | 100 | 0.004 | 0.001 | 0.011 |
| 111           | 0   | <LOQ  | <LOQ  | <LOQ  | 0   | <LOQ  | <LOQ  | <LOQ  |
| 112           | 0   | <LOQ  | <LOQ  | <LOQ  | 0   | <LOQ  | <LOQ  | <LOQ  |
| 114           | 33  | <LOQ  | <LOQ  | 0.001 | 8   | <LOQ  | <LOQ  | 0.000 |
| 115           | 8   | <LOQ  | <LOQ  | 0.000 | 0   | <LOQ  | <LOQ  | <LOQ  |
| 117           | 67  | 0.001 | <LOQ  | 0.004 | 58  | 0.000 | <LOQ  | 0.000 |
| 118           | 100 | 0.022 | 0.006 | 0.052 | 100 | 0.002 | 0.001 | 0.005 |
| 120           | 0   | <LOQ  | <LOQ  | <LOQ  | 0   | <LOQ  | <LOQ  | <LOQ  |
| 121           | 0   | <LOQ  | <LOQ  | <LOQ  | 8   | <LOQ  | <LOQ  | 0.000 |
| 122           | 0   | <LOQ  | <LOQ  | <LOQ  | 0   | <LOQ  | <LOQ  | <LOQ  |
| 123           | 25  | <LOQ  | <LOQ  | 0.001 | 0   | <LOQ  | <LOQ  | <LOQ  |
| 126           | 0   | <LOQ  | <LOQ  | <LOQ  | 0   | <LOQ  | <LOQ  | <LOQ  |
| 127           | 0   | <LOQ  | <LOQ  | <LOQ  | 0   | <LOQ  | <LOQ  | <LOQ  |

**Table S11, continued**

|             |     |       |       |       |     |       |       |       |
|-------------|-----|-------|-------|-------|-----|-------|-------|-------|
| 128+166     | 83  | 0.002 | <LOQ  | 0.005 | 100 | 0.000 | 0.000 | 0.001 |
| 129+138+163 | 100 | 0.016 | 0.005 | 0.038 | 100 | 0.003 | 0.001 | 0.007 |
| 130         | 83  | 0.001 | <LOQ  | 0.002 | 92  | 0.000 | 0.000 | 0.000 |
| 131         | 75  | 0.000 | <LOQ  | 0.001 | 58  | 0.000 | <LOQ  | 0.000 |
| 132         | 100 | 0.010 | 0.003 | 0.022 | 100 | 0.001 | 0.000 | 0.003 |
| 133         | 50  | 0.000 | <LOQ  | 0.001 | 17  | <LOQ  | <LOQ  | 0.000 |
| 134         | 100 | 0.003 | 0.000 | 0.006 | 92  | 0.000 | 0.000 | 0.001 |
| 135+151     | 100 | 0.011 | 0.003 | 0.024 | 100 | 0.001 | 0.001 | 0.004 |
| 136         | 100 | 0.008 | 0.002 | 0.018 | 100 | 0.001 | 0.000 | 0.002 |
| 137         | 75  | 0.001 | <LOQ  | 0.002 | 75  | 0.000 | <LOQ  | 0.000 |
| 139+140     | 83  | 0.001 | <LOQ  | 0.002 | 67  | 0.000 | <LOQ  | 0.000 |
| 141         | 100 | 0.003 | 0.001 | 0.007 | 100 | 0.001 | 0.000 | 0.001 |
| 142         | 0   | <LOQ  | <LOQ  | <LOQ  | 0   | <LOQ  | <LOQ  | <LOQ  |
| 143         | 0   | <LOQ  | <LOQ  | <LOQ  | 0   | <LOQ  | <LOQ  | <LOQ  |
| 144         | 92  | 0.002 | 0.000 | 0.004 | 100 | 0.000 | 0.000 | 0.000 |
| 145         | 0   | <LOQ  | <LOQ  | <LOQ  | 0   | <LOQ  | <LOQ  | <LOQ  |
| 146         | 100 | 0.002 | 0.001 | 0.005 | 100 | 0.000 | 0.000 | 0.001 |
| 147+149     | 100 | 0.024 | 0.007 | 0.058 | 100 | 0.003 | 0.001 | 0.008 |
| 148         | 0   | <LOQ  | <LOQ  | <LOQ  | 8   | <LOQ  | <LOQ  | 0.000 |
| 150         | 42  | <LOQ  | <LOQ  | 0.000 | 0   | <LOQ  | <LOQ  | <LOQ  |
| 152         | 17  | <LOQ  | <LOQ  | 0.000 | 0   | <LOQ  | <LOQ  | <LOQ  |
| 153+168     | 100 | 0.014 | 0.004 | 0.032 | 100 | 0.002 | 0.001 | 0.006 |
| 154         | 67  | 0.000 | <LOQ  | 0.001 | 42  | <LOQ  | <LOQ  | 0.000 |
| 155         | 83  | 0.000 | <LOQ  | 0.001 | 8   | <LOQ  | <LOQ  | 0.000 |
| 156+157     | 67  | 0.001 | <LOQ  | 0.003 | 92  | 0.000 | 0.000 | 0.000 |
| 158         | 100 | 0.002 | 0.000 | 0.004 | 100 | 0.000 | 0.000 | 0.001 |
| 159         | 0   | <LOQ  | <LOQ  | <LOQ  | 0   | <LOQ  | <LOQ  | <LOQ  |
| 160         | 0   | <LOQ  | <LOQ  | <LOQ  | 0   | <LOQ  | <LOQ  | <LOQ  |
| 161         | 0   | <LOQ  | <LOQ  | <LOQ  | 0   | <LOQ  | <LOQ  | <LOQ  |
| 162         | 0   | <LOQ  | <LOQ  | <LOQ  | 0   | <LOQ  | <LOQ  | <LOQ  |
| 164         | 67  | 0.001 | <LOQ  | 0.002 | 92  | 0.000 | 0.000 | 0.000 |
| 165         | 0   | <LOQ  | <LOQ  | <LOQ  | 0   | <LOQ  | <LOQ  | <LOQ  |
| 167         | 33  | <LOQ  | <LOQ  | 0.001 | 50  | 0.000 | <LOQ  | 0.000 |
| 169         | 0   | <LOQ  | <LOQ  | <LOQ  | 0   | <LOQ  | <LOQ  | <LOQ  |
| 170         | 25  | <LOQ  | <LOQ  | 0.001 | 100 | 0.000 | 0.000 | 0.001 |
| 171+173     | 33  | <LOQ  | <LOQ  | 0.001 | 92  | 0.000 | 0.000 | 0.000 |
| 172         | 0   | <LOQ  | <LOQ  | <LOQ  | 42  | <LOQ  | <LOQ  | 0.000 |
| 174         | 67  | 0.001 | <LOQ  | 0.002 | 100 | 0.000 | 0.000 | 0.001 |
| 175         | 0   | <LOQ  | <LOQ  | <LOQ  | 8   | <LOQ  | <LOQ  | 0.000 |
| 176         | 75  | 0.000 | <LOQ  | 0.001 | 92  | 0.000 | 0.000 | 0.000 |
| 177         | 33  | <LOQ  | <LOQ  | 0.001 | 75  | 0.000 | <LOQ  | 0.001 |
| 178         | 17  | <LOQ  | <LOQ  | 0.000 | 83  | 0.000 | <LOQ  | 0.000 |
| 179         | 92  | 0.001 | 0.000 | 0.003 | 100 | 0.000 | 0.000 | 0.001 |
| 180+193     | 58  | 0.001 | <LOQ  | 0.002 | 100 | 0.001 | 0.000 | 0.003 |
| 181         | 0   | <LOQ  | <LOQ  | <LOQ  | 17  | <LOQ  | <LOQ  | 0.000 |
| 182         | 0   | <LOQ  | <LOQ  | <LOQ  | 0   | <LOQ  | <LOQ  | <LOQ  |
| 183         | 83  | 0.001 | <LOQ  | 0.002 | 100 | 0.000 | 0.000 | 0.001 |
| 184         | 58  | 0.000 | <LOQ  | 0.001 | 0   | <LOQ  | <LOQ  | <LOQ  |
| 185         | 33  | <LOQ  | <LOQ  | 0.000 | 75  | 0.000 | <LOQ  | 0.000 |
| 186         | 0   | <LOQ  | <LOQ  | <LOQ  | 0   | <LOQ  | <LOQ  | <LOQ  |
| 187         | 92  | 0.002 | 0.000 | 0.003 | 100 | 0.001 | 0.000 | 0.004 |
| 188         | 0   | <LOQ  | <LOQ  | <LOQ  | 8   | <LOQ  | <LOQ  | 0.000 |
| 189         | 0   | <LOQ  | <LOQ  | <LOQ  | 0   | <LOQ  | <LOQ  | <LOQ  |
| 190         | 8   | <LOQ  | <LOQ  | 0.000 | 33  | <LOQ  | <LOQ  | 0.000 |

**Table S11, continued**

|         |    |      |      |       |     |       |       |       |
|---------|----|------|------|-------|-----|-------|-------|-------|
| 191     | 0  | <LOQ | <LOQ | <LOQ  | 8   | <LOQ  | <LOQ  | 0.000 |
| 192     | 0  | <LOQ | <LOQ | <LOQ  | 0   | <LOQ  | <LOQ  | <LOQ  |
| 194     | 0  | <LOQ | <LOQ | <LOQ  | 67  | 0.000 | <LOQ  | 0.001 |
| 195     | 0  | <LOQ | <LOQ | <LOQ  | 8   | <LOQ  | <LOQ  | 0.000 |
| 196     | 0  | <LOQ | <LOQ | <LOQ  | 67  | 0.000 | <LOQ  | 0.001 |
| 197     | 0  | <LOQ | <LOQ | <LOQ  | 0   | <LOQ  | <LOQ  | <LOQ  |
| 198+199 | 17 | <LOQ | <LOQ | 0.001 | 100 | 0.001 | 0.000 | 0.002 |
| 200     | 0  | <LOQ | <LOQ | <LOQ  | 33  | <LOQ  | <LOQ  | 0.000 |
| 201     | 33 | <LOQ | <LOQ | 0.000 | 83  | 0.000 | <LOQ  | 0.000 |
| 202     | 33 | <LOQ | <LOQ | 0.001 | 100 | 0.000 | 0.000 | 0.001 |
| 203     | 17 | <LOQ | <LOQ | 0.000 | 100 | 0.000 | 0.000 | 0.001 |
| 205     | 0  | <LOQ | <LOQ | <LOQ  | 0   | <LOQ  | <LOQ  | <LOQ  |
| 206     | 0  | <LOQ | <LOQ | <LOQ  | 75  | 0.000 | <LOQ  | 0.001 |
| 207     | 0  | <LOQ | <LOQ | <LOQ  | 42  | <LOQ  | <LOQ  | 0.000 |
| 208     | 0  | <LOQ | <LOQ | <LOQ  | 67  | 0.000 | <LOQ  | 0.000 |
| 209     | 0  | <LOQ | <LOQ | <LOQ  | 8   | <LOQ  | <LOQ  | 0.000 |

**Table S12** EC School 4 indoor and outdoor PCB concentration summary data: percent detection (%) and median, 5<sup>th</sup> percentile, and 95<sup>th</sup> percentile (ng/m<sup>3</sup>)

| PCB      | Indoor |        |                   |                    | Outdoor |        |                   |                    |
|----------|--------|--------|-------------------|--------------------|---------|--------|-------------------|--------------------|
|          | %Det   | Median | 5 <sup>th</sup> % | 95 <sup>th</sup> % | %Det    | Median | 5 <sup>th</sup> % | 95 <sup>th</sup> % |
| ΣPCBs    | 100    | 37.010 | 26.494            | 75.089             | 100     | 0.360  | 0.277             | 0.957              |
| 1        | 100    | 1.953  | 1.369             | 3.343              | 100     | 0.006  | 0.003             | 0.060              |
| 2        | 100    | 0.103  | 0.063             | 0.181              | 100     | 0.003  | 0.002             | 0.004              |
| 3        | 100    | 0.432  | 0.260             | 0.704              | 100     | 0.004  | 0.002             | 0.011              |
| 4        | 100    | 4.745  | 3.746             | 8.927              | 100     | 0.010  | 0.008             | 0.081              |
| 5        | 100    | 0.146  | 0.107             | 0.263              | 0       | <LOQ   | <LOQ              | <LOQ               |
| 6        | 100    | 1.250  | 0.927             | 2.197              | 100     | 0.003  | 0.002             | 0.014              |
| 7        | 100    | 0.312  | 0.222             | 0.516              | 100     | 0.001  | 0.000             | 0.003              |
| 8        | 100    | 6.004  | 3.991             | 9.931              | 100     | 0.014  | 0.011             | 0.057              |
| 9        | 100    | 0.527  | 0.379             | 0.915              | 100     | 0.001  | 0.001             | 0.005              |
| 10       | 100    | 0.203  | 0.158             | 0.375              | 100     | 0.000  | 0.000             | 0.003              |
| 11       | 100    | 0.294  | 0.226             | 0.729              | 100     | 0.008  | 0.005             | 0.020              |
| 12+13    | 100    | 0.144  | 0.085             | 0.228              | 75      | 0.001  | 0.000             | 0.002              |
| 14       | 29     | <LOQ   | <LOQ              | 0.001              | 75      | 0.000  | 0.000             | 0.000              |
| 15       | 100    | 0.748  | 0.487             | 1.391              | 100     | 0.003  | 0.003             | 0.009              |
| 16       | 100    | 1.606  | 1.049             | 3.496              | 100     | 0.010  | 0.008             | 0.023              |
| 17       | 100    | 1.723  | 1.122             | 3.705              | 100     | 0.009  | 0.008             | 0.021              |
| 18+30    | 100    | 3.867  | 2.525             | 8.504              | 100     | 0.021  | 0.019             | 0.053              |
| 19       | 100    | 0.685  | 0.477             | 1.421              | 100     | 0.003  | 0.003             | 0.008              |
| 20+28    | 100    | 2.066  | 1.138             | 4.140              | 100     | 0.017  | 0.015             | 0.036              |
| 21+33    | 100    | 1.378  | 0.761             | 2.737              | 100     | 0.010  | 0.010             | 0.022              |
| 22       | 100    | 0.777  | 0.400             | 1.470              | 100     | 0.006  | 0.005             | 0.014              |
| 23       | 100    | 0.005  | 0.003             | 0.010              | 25      | <LOQ   | <LOQ              | 0.000              |
| 24       | 100    | 0.061  | 0.039             | 0.141              | 100     | 0.000  | 0.000             | 0.001              |
| 25       | 100    | 0.191  | 0.107             | 0.411              | 100     | 0.002  | 0.001             | 0.006              |
| 26+29    | 100    | 0.447  | 0.229             | 0.912              | 100     | 0.003  | 0.003             | 0.007              |
| 27       | 100    | 0.207  | 0.132             | 0.460              | 100     | 0.001  | 0.001             | 0.003              |
| 31       | 100    | 2.044  | 1.110             | 4.288              | 100     | 0.016  | 0.014             | 0.035              |
| 32       | 100    | 0.858  | 0.507             | 1.783              | 100     | 0.006  | 0.005             | 0.012              |
| 34       | 100    | 0.008  | 0.005             | 0.018              | 100     | 0.000  | 0.000             | 0.000              |
| 35       | 100    | 0.011  | 0.004             | 0.017              | 100     | 0.000  | 0.000             | 0.001              |
| 36       | 0      | <LOQ   | <LOQ              | <LOQ               | 0       | <LOQ   | <LOQ              | <LOQ               |
| 37       | 100    | 0.211  | 0.082             | 0.338              | 100     | 0.003  | 0.002             | 0.006              |
| 38       | 43     | <LOQ   | <LOQ              | 0.002              | 25      | <LOQ   | <LOQ              | 0.000              |
| 39       | 14     | <LOQ   | <LOQ              | 0.002              | 25      | <LOQ   | <LOQ              | 0.000              |
| 40+71    | 100    | 0.404  | 0.180             | 0.797              | 100     | 0.007  | 0.005             | 0.014              |
| 41       | 100    | 0.146  | 0.065             | 0.299              | 100     | 0.002  | 0.001             | 0.004              |
| 42       | 100    | 0.298  | 0.133             | 0.593              | 100     | 0.005  | 0.003             | 0.009              |
| 43       | 100    | 0.064  | 0.030             | 0.149              | 100     | 0.001  | 0.001             | 0.002              |
| 44+47+65 | 100    | 0.963  | 0.433             | 1.952              | 100     | 0.016  | 0.011             | 0.034              |
| 45       | 100    | 0.391  | 0.183             | 0.938              | 100     | 0.004  | 0.003             | 0.009              |
| 46       | 100    | 0.115  | 0.056             | 0.280              | 100     | 0.002  | 0.001             | 0.003              |
| 48       | 100    | 0.364  | 0.156             | 0.777              | 100     | 0.004  | 0.003             | 0.008              |
| 49+69    | 100    | 0.686  | 0.300             | 1.483              | 100     | 0.011  | 0.007             | 0.022              |
| 50+53    | 100    | 0.284  | 0.145             | 0.801              | 100     | 0.004  | 0.003             | 0.007              |
| 51       | 100    | 0.079  | 0.038             | 0.187              | 100     | 0.001  | 0.001             | 0.002              |
| 52       | 100    | 1.059  | 0.504             | 2.347              | 100     | 0.023  | 0.015             | 0.050              |
| 54       | 100    | 0.006  | 0.004             | 0.020              | 100     | 0.000  | 0.000             | 0.000              |
| 55       | 71     | 0.003  | <LOQ              | 0.008              | 50      | 0.000  | <LOQ              | 0.000              |
| 56       | 100    | 0.021  | 0.013             | 0.033              | 100     | 0.002  | 0.002             | 0.005              |

**Table S12, continued**

|               |     |       |       |       |     |       |       |       |
|---------------|-----|-------|-------|-------|-----|-------|-------|-------|
| 57            | 86  | 0.003 | 0.001 | 0.005 | 25  | <LOQ  | <LOQ  | 0.000 |
| 58            | 0   | <LOQ  | <LOQ  | <LOQ  | 0   | <LOQ  | <LOQ  | <LOQ  |
| 59+62+75      | 100 | 0.101 | 0.043 | 0.215 | 100 | 0.001 | 0.001 | 0.003 |
| 60            | 100 | 0.013 | 0.007 | 0.018 | 100 | 0.001 | 0.001 | 0.002 |
| 61+70+74+76   | 100 | 0.303 | 0.138 | 0.522 | 100 | 0.013 | 0.008 | 0.027 |
| 63            | 100 | 0.012 | 0.005 | 0.021 | 100 | 0.000 | 0.000 | 0.001 |
| 64            | 100 | 0.413 | 0.183 | 0.830 | 100 | 0.007 | 0.004 | 0.015 |
| 66            | 100 | 0.108 | 0.048 | 0.180 | 100 | 0.005 | 0.003 | 0.011 |
| 67            | 100 | 0.013 | 0.006 | 0.025 | 100 | 0.000 | 0.000 | 0.001 |
| 68            | 100 | 0.003 | 0.001 | 0.008 | 25  | <LOQ  | <LOQ  | 0.000 |
| 72            | 86  | 0.003 | 0.001 | 0.005 | 25  | <LOQ  | <LOQ  | 0.000 |
| 73            | 29  | <LOQ  | <LOQ  | 0.004 | 25  | <LOQ  | <LOQ  | 0.000 |
| 77            | 14  | <LOQ  | <LOQ  | 0.001 | 50  | 0.000 | <LOQ  | 0.001 |
| 78            | 0   | <LOQ  | <LOQ  | <LOQ  | 0   | <LOQ  | <LOQ  | <LOQ  |
| 79            | 0   | <LOQ  | <LOQ  | <LOQ  | 25  | <LOQ  | <LOQ  | 0.000 |
| 80            | 0   | <LOQ  | <LOQ  | <LOQ  | 0   | <LOQ  | <LOQ  | <LOQ  |
| 81            | 0   | <LOQ  | <LOQ  | <LOQ  | 0   | <LOQ  | <LOQ  | <LOQ  |
| 82            | 86  | 0.003 | 0.001 | 0.005 | 75  | 0.001 | 0.000 | 0.002 |
| 83            | 100 | 0.001 | 0.001 | 0.002 | 75  | 0.000 | 0.000 | 0.001 |
| 84            | 100 | 0.021 | 0.013 | 0.032 | 100 | 0.003 | 0.001 | 0.006 |
| 85+116        | 100 | 0.003 | 0.003 | 0.006 | 100 | 0.001 | 0.001 | 0.002 |
| 86+97+109+119 | 100 | 0.008 | 0.007 | 0.013 | 100 | 0.002 | 0.001 | 0.004 |
| 87+125        | 100 | 0.011 | 0.007 | 0.019 | 100 | 0.003 | 0.002 | 0.007 |
| 88            | 29  | <LOQ  | <LOQ  | 0.002 | 0   | <LOQ  | <LOQ  | <LOQ  |
| 89            | 86  | 0.002 | 0.000 | 0.003 | 75  | 0.000 | 0.000 | 0.000 |
| 90+101+113    | 100 | 0.038 | 0.029 | 0.059 | 100 | 0.008 | 0.005 | 0.019 |
| 91            | 100 | 0.021 | 0.011 | 0.030 | 100 | 0.001 | 0.001 | 0.003 |
| 92            | 100 | 0.007 | 0.006 | 0.012 | 100 | 0.001 | 0.001 | 0.003 |
| 93+100        | 100 | 0.003 | 0.002 | 0.006 | 25  | <LOQ  | <LOQ  | 0.000 |
| 94            | 100 | 0.002 | 0.001 | 0.003 | 50  | 0.000 | <LOQ  | 0.000 |
| 95            | 100 | 0.113 | 0.059 | 0.164 | 100 | 0.008 | 0.005 | 0.022 |
| 96            | 100 | 0.005 | 0.003 | 0.011 | 100 | 0.000 | 0.000 | 0.000 |
| 98            | 0   | <LOQ  | <LOQ  | <LOQ  | 0   | <LOQ  | <LOQ  | <LOQ  |
| 99            | 100 | 0.014 | 0.010 | 0.023 | 100 | 0.003 | 0.002 | 0.007 |
| 102           | 100 | 0.010 | 0.005 | 0.015 | 100 | 0.000 | 0.000 | 0.001 |
| 103           | 100 | 0.002 | 0.001 | 0.003 | 75  | 0.000 | 0.000 | 0.000 |
| 104           | 57  | 0.000 | <LOQ  | 0.000 | 0   | <LOQ  | <LOQ  | <LOQ  |
| 105           | 100 | 0.004 | 0.002 | 0.005 | 100 | 0.001 | 0.001 | 0.003 |
| 106           | 0   | <LOQ  | <LOQ  | <LOQ  | 0   | <LOQ  | <LOQ  | <LOQ  |
| 107+124       | 57  | 0.001 | <LOQ  | 0.001 | 50  | 0.000 | <LOQ  | 0.000 |
| 108           | 43  | <LOQ  | <LOQ  | 0.001 | 75  | 0.000 | 0.000 | 0.001 |
| 110           | 100 | 0.024 | 0.018 | 0.042 | 100 | 0.007 | 0.004 | 0.018 |
| 111           | 0   | <LOQ  | <LOQ  | <LOQ  | 0   | <LOQ  | <LOQ  | <LOQ  |
| 112           | 0   | <LOQ  | <LOQ  | <LOQ  | 0   | <LOQ  | <LOQ  | <LOQ  |
| 114           | 14  | <LOQ  | <LOQ  | 0.000 | 25  | <LOQ  | <LOQ  | 0.000 |
| 115           | 0   | <LOQ  | <LOQ  | <LOQ  | 0   | <LOQ  | <LOQ  | <LOQ  |
| 117           | 86  | 0.001 | 0.000 | 0.001 | 75  | 0.000 | 0.000 | 0.000 |
| 118           | 100 | 0.012 | 0.009 | 0.018 | 100 | 0.004 | 0.002 | 0.009 |
| 120           | 0   | <LOQ  | <LOQ  | <LOQ  | 0   | <LOQ  | <LOQ  | <LOQ  |
| 121           | 0   | <LOQ  | <LOQ  | <LOQ  | 25  | <LOQ  | <LOQ  | 0.000 |
| 122           | 0   | <LOQ  | <LOQ  | <LOQ  | 25  | <LOQ  | <LOQ  | 0.000 |
| 123           | 0   | <LOQ  | <LOQ  | <LOQ  | 25  | <LOQ  | <LOQ  | 0.000 |
| 126           | 0   | <LOQ  | <LOQ  | <LOQ  | 0   | <LOQ  | <LOQ  | <LOQ  |
| 127           | 0   | <LOQ  | <LOQ  | <LOQ  | 0   | <LOQ  | <LOQ  | <LOQ  |

**Table S12, continued**

|             |     |       |       |       |     |       |       |       |
|-------------|-----|-------|-------|-------|-----|-------|-------|-------|
| 128+166     | 86  | 0.001 | 0.000 | 0.003 | 100 | 0.001 | 0.000 | 0.001 |
| 129+138+163 | 100 | 0.012 | 0.007 | 0.016 | 100 | 0.007 | 0.003 | 0.012 |
| 130         | 71  | 0.001 | <LOQ  | 0.001 | 100 | 0.000 | 0.000 | 0.001 |
| 131         | 71  | 0.000 | <LOQ  | 0.001 | 25  | <LOQ  | <LOQ  | 0.000 |
| 132         | 100 | 0.006 | 0.004 | 0.008 | 100 | 0.003 | 0.001 | 0.005 |
| 133         | 57  | 0.000 | <LOQ  | 0.000 | 25  | <LOQ  | <LOQ  | 0.000 |
| 134         | 86  | 0.002 | 0.000 | 0.002 | 100 | 0.001 | 0.000 | 0.001 |
| 135+151     | 100 | 0.010 | 0.006 | 0.016 | 100 | 0.003 | 0.002 | 0.006 |
| 136         | 100 | 0.004 | 0.003 | 0.007 | 100 | 0.001 | 0.001 | 0.003 |
| 137         | 86  | 0.001 | 0.000 | 0.001 | 100 | 0.000 | 0.000 | 0.001 |
| 139+140     | 71  | 0.000 | <LOQ  | 0.001 | 100 | 0.000 | 0.000 | 0.000 |
| 141         | 100 | 0.003 | 0.002 | 0.004 | 100 | 0.001 | 0.001 | 0.002 |
| 142         | 0   | <LOQ  | <LOQ  | <LOQ  | 0   | <LOQ  | <LOQ  | <LOQ  |
| 143         | 0   | <LOQ  | <LOQ  | <LOQ  | 0   | <LOQ  | <LOQ  | <LOQ  |
| 144         | 100 | 0.002 | 0.001 | 0.002 | 100 | 0.000 | 0.000 | 0.001 |
| 145         | 0   | <LOQ  | <LOQ  | <LOQ  | 0   | <LOQ  | <LOQ  | <LOQ  |
| 146         | 100 | 0.002 | 0.001 | 0.003 | 100 | 0.001 | 0.000 | 0.002 |
| 147+149     | 100 | 0.019 | 0.014 | 0.029 | 100 | 0.006 | 0.003 | 0.014 |
| 148         | 0   | <LOQ  | <LOQ  | <LOQ  | 0   | <LOQ  | <LOQ  | <LOQ  |
| 150         | 14  | <LOQ  | <LOQ  | 0.000 | 25  | <LOQ  | <LOQ  | 0.000 |
| 152         | 14  | <LOQ  | <LOQ  | 0.000 | 0   | <LOQ  | <LOQ  | <LOQ  |
| 153+168     | 100 | 0.014 | 0.009 | 0.019 | 100 | 0.005 | 0.003 | 0.011 |
| 154         | 43  | <LOQ  | <LOQ  | 0.000 | 100 | 0.000 | 0.000 | 0.000 |
| 155         | 57  | 0.000 | <LOQ  | 0.000 | 25  | <LOQ  | <LOQ  | 0.000 |
| 156+157     | 71  | 0.000 | <LOQ  | 0.002 | 100 | 0.001 | 0.000 | 0.001 |
| 158         | 100 | 0.001 | 0.001 | 0.002 | 100 | 0.001 | 0.000 | 0.001 |
| 159         | 0   | <LOQ  | <LOQ  | <LOQ  | 0   | <LOQ  | <LOQ  | <LOQ  |
| 160         | 0   | <LOQ  | <LOQ  | <LOQ  | 0   | <LOQ  | <LOQ  | <LOQ  |
| 161         | 0   | <LOQ  | <LOQ  | <LOQ  | 0   | <LOQ  | <LOQ  | <LOQ  |
| 162         | 0   | <LOQ  | <LOQ  | <LOQ  | 0   | <LOQ  | <LOQ  | <LOQ  |
| 164         | 86  | 0.001 | 0.000 | 0.001 | 100 | 0.000 | 0.000 | 0.001 |
| 165         | 0   | <LOQ  | <LOQ  | <LOQ  | 0   | <LOQ  | <LOQ  | <LOQ  |
| 167         | 29  | <LOQ  | <LOQ  | 0.000 | 75  | 0.000 | 0.000 | 0.000 |
| 169         | 0   | <LOQ  | <LOQ  | <LOQ  | 0   | <LOQ  | <LOQ  | <LOQ  |
| 170         | 29  | <LOQ  | <LOQ  | 0.001 | 100 | 0.001 | 0.001 | 0.001 |
| 171+173     | 86  | 0.001 | 0.000 | 0.001 | 100 | 0.000 | 0.000 | 0.001 |
| 172         | 14  | <LOQ  | <LOQ  | 0.000 | 50  | 0.000 | <LOQ  | 0.000 |
| 174         | 86  | 0.002 | 0.000 | 0.003 | 100 | 0.001 | 0.001 | 0.002 |
| 175         | 29  | <LOQ  | <LOQ  | 0.000 | 75  | 0.000 | 0.000 | 0.000 |
| 176         | 100 | 0.001 | 0.000 | 0.002 | 100 | 0.000 | 0.000 | 0.001 |
| 177         | 71  | 0.001 | <LOQ  | 0.002 | 100 | 0.001 | 0.000 | 0.001 |
| 178         | 86  | 0.001 | 0.000 | 0.001 | 75  | 0.000 | 0.000 | 0.001 |
| 179         | 100 | 0.004 | 0.002 | 0.006 | 100 | 0.001 | 0.000 | 0.003 |
| 180+193     | 86  | 0.003 | 0.000 | 0.004 | 100 | 0.003 | 0.002 | 0.005 |
| 181         | 0   | <LOQ  | <LOQ  | <LOQ  | 0   | <LOQ  | <LOQ  | <LOQ  |
| 182         | 0   | <LOQ  | <LOQ  | <LOQ  | 25  | <LOQ  | <LOQ  | 0.000 |
| 183         | 100 | 0.003 | 0.001 | 0.004 | 100 | 0.001 | 0.001 | 0.002 |
| 184         | 14  | <LOQ  | <LOQ  | 0.000 | 50  | 0.000 | <LOQ  | 0.000 |
| 185         | 86  | 0.001 | 0.000 | 0.001 | 100 | 0.000 | 0.000 | 0.001 |
| 186         | 0   | <LOQ  | <LOQ  | <LOQ  | 0   | <LOQ  | <LOQ  | <LOQ  |
| 187         | 100 | 0.006 | 0.004 | 0.009 | 100 | 0.003 | 0.001 | 0.009 |
| 188         | 0   | <LOQ  | <LOQ  | <LOQ  | 25  | <LOQ  | <LOQ  | 0.000 |
| 189         | 14  | <LOQ  | <LOQ  | 0.000 | 0   | <LOQ  | <LOQ  | <LOQ  |
| 190         | 0   | <LOQ  | <LOQ  | <LOQ  | 75  | 0.000 | 0.000 | 0.000 |

**Table S12, continued**

|         |    |       |       |       |     |       |       |       |
|---------|----|-------|-------|-------|-----|-------|-------|-------|
| 191     | 0  | <LOQ  | <LOQ  | <LOQ  | 0   | <LOQ  | <LOQ  | <LOQ  |
| 192     | 0  | <LOQ  | <LOQ  | <LOQ  | 0   | <LOQ  | <LOQ  | <LOQ  |
| 194     | 0  | <LOQ  | <LOQ  | <LOQ  | 100 | 0.001 | 0.000 | 0.001 |
| 195     | 0  | <LOQ  | <LOQ  | <LOQ  | 25  | <LOQ  | <LOQ  | 0.000 |
| 196     | 29 | <LOQ  | <LOQ  | 0.000 | 100 | 0.001 | 0.000 | 0.001 |
| 197     | 0  | <LOQ  | <LOQ  | <LOQ  | 25  | <LOQ  | <LOQ  | 0.000 |
| 198+199 | 43 | <LOQ  | <LOQ  | 0.002 | 100 | 0.002 | 0.001 | 0.004 |
| 200     | 29 | <LOQ  | <LOQ  | 0.001 | 75  | 0.000 | 0.000 | 0.001 |
| 201     | 86 | 0.001 | 0.000 | 0.001 | 100 | 0.000 | 0.000 | 0.001 |
| 202     | 86 | 0.001 | 0.000 | 0.002 | 100 | 0.001 | 0.000 | 0.003 |
| 203     | 57 | 0.001 | <LOQ  | 0.001 | 100 | 0.001 | 0.001 | 0.003 |
| 205     | 0  | <LOQ  | <LOQ  | <LOQ  | 0   | <LOQ  | <LOQ  | <LOQ  |
| 206     | 0  | <LOQ  | <LOQ  | <LOQ  | 100 | 0.001 | 0.001 | 0.001 |
| 207     | 0  | <LOQ  | <LOQ  | <LOQ  | 75  | 0.000 | 0.000 | 0.000 |
| 208     | 29 | <LOQ  | <LOQ  | 0.001 | 100 | 0.001 | 0.000 | 0.001 |
| 209     | 0  | <LOQ  | <LOQ  | <LOQ  | 25  | <LOQ  | <LOQ  | 0.001 |

**Table S13** CJ Schools 1 and 2 indoor and outdoor PCB concentration summary data: percent detection (%) and median, 5<sup>th</sup> percentile, and 95<sup>th</sup> percentile (ng/m<sup>3</sup>)

| PCB         | CJ School 1 Indoor |        |                   |                    | CJ School 2 Indoor |        |                   |                    | Outdoor |        |                   |                    |
|-------------|--------------------|--------|-------------------|--------------------|--------------------|--------|-------------------|--------------------|---------|--------|-------------------|--------------------|
|             | %Det               | Median | 5 <sup>th</sup> % | 95 <sup>th</sup> % | %Det               | Median | 5 <sup>th</sup> % | 95 <sup>th</sup> % | %Det    | Median | 5 <sup>th</sup> % | 95 <sup>th</sup> % |
| ΣPCBs       | 100                | 22.172 | 10.541            | 86.556             | 100                | 7.781  | 4.049             | 18.671             | 100     | 0.159  | 0.051             | 1.423              |
| 1           | 100                | 0.159  | 0.062             | 0.296              | 100                | 0.077  | 0.044             | 0.206              | 100     | 0.013  | 0.005             | 0.024              |
| 2           | 100                | 0.018  | 0.008             | 0.053              | 100                | 0.011  | 0.006             | 0.030              | 100     | 0.001  | 0.001             | 0.002              |
| 3           | 100                | 0.091  | 0.042             | 0.292              | 100                | 0.052  | 0.022             | 0.138              | 92      | 0.004  | 0.002             | 0.036              |
| 4           | 100                | 0.131  | 0.040             | 0.247              | 100                | 0.072  | 0.035             | 0.170              | 100     | 0.008  | 0.003             | 0.015              |
| 5           | 8                  | <LOQ   | <LOQ              | 0.007              | 0                  | <LOQ   | <LOQ              | <LOQ               | 0       | <LOQ   | <LOQ              | <LOQ               |
| 6           | 100                | 0.048  | 0.017             | 0.124              | 100                | 0.029  | 0.014             | 0.067              | 100     | 0.001  | 0.001             | 0.005              |
| 7           | 100                | 0.013  | 0.005             | 0.031              | 100                | 0.006  | 0.004             | 0.017              | 100     | 0.001  | 0.000             | 0.001              |
| 8           | 100                | 0.195  | 0.082             | 0.590              | 100                | 0.132  | 0.060             | 0.313              | 100     | 0.005  | 0.002             | 0.020              |
| 9           | 100                | 0.017  | 0.006             | 0.040              | 100                | 0.008  | 0.004             | 0.021              | 100     | 0.001  | 0.000             | 0.002              |
| 10          | 100                | 0.006  | 0.002             | 0.010              | 100                | 0.003  | 0.002             | 0.006              | 77      | 0.000  | <LOQ              | 0.001              |
| 11          | 100                | 0.237  | 0.098             | 0.565              | 100                | 0.369  | 0.208             | 0.857              | 100     | 0.005  | 0.002             | 0.033              |
| 12+13       | 92                 | 0.012  | 0.004             | 0.038              | 62                 | 0.009  | <LOQ              | 0.022              | 15      | <LOQ   | <LOQ              | 0.003              |
| 14          | 85                 | 0.001  | <LOQ              | 0.001              | 77                 | 0.001  | <LOQ              | 0.001              | 38      | <LOQ   | <LOQ              | 0.000              |
| 15          | 100                | 0.051  | 0.021             | 0.167              | 100                | 0.034  | 0.015             | 0.074              | 92      | 0.001  | 0.000             | 0.005              |
| 16          | 100                | 0.132  | 0.062             | 0.510              | 100                | 0.075  | 0.035             | 0.177              | 92      | 0.003  | 0.001             | 0.010              |
| 17          | 100                | 0.124  | 0.060             | 0.460              | 100                | 0.067  | 0.031             | 0.168              | 100     | 0.003  | 0.001             | 0.009              |
| 18+30       | 100                | 0.365  | 0.161             | 1.289              | 100                | 0.175  | 0.074             | 0.440              | 100     | 0.008  | 0.002             | 0.024              |
| 19          | 100                | 0.034  | 0.014             | 0.110              | 100                | 0.019  | 0.008             | 0.043              | 92      | 0.001  | 0.000             | 0.003              |
| 20+28       | 100                | 0.286  | 0.147             | 1.118              | 100                | 0.147  | 0.071             | 0.330              | 100     | 0.003  | 0.001             | 0.023              |
| 21+33       | 100                | 0.173  | 0.085             | 0.668              | 100                | 0.091  | 0.046             | 0.207              | 92      | 0.002  | 0.001             | 0.013              |
| 22          | 100                | 0.096  | 0.048             | 0.373              | 100                | 0.052  | 0.026             | 0.111              | 92      | 0.001  | 0.000             | 0.008              |
| 23          | 15                 | <LOQ   | <LOQ              | 0.002              | 8                  | <LOQ   | <LOQ              | 0.000              | 0       | <LOQ   | <LOQ              | <LOQ               |
| 24          | 100                | 0.003  | 0.001             | 0.010              | 100                | 0.002  | 0.001             | 0.004              | 54      | 0.000  | <LOQ              | 0.000              |
| 25          | 100                | 0.013  | 0.008             | 0.057              | 85                 | 0.010  | <LOQ              | 0.024              | 8       | <LOQ   | <LOQ              | 0.001              |
| 26+29       | 100                | 0.040  | 0.021             | 0.167              | 100                | 0.023  | 0.011             | 0.050              | 85      | 0.001  | <LOQ              | 0.004              |
| 27          | 100                | 0.013  | 0.007             | 0.054              | 100                | 0.009  | 0.004             | 0.020              | 92      | 0.000  | 0.000             | 0.001              |
| 31          | 100                | 0.394  | 0.192             | 1.493              | 100                | 0.164  | 0.076             | 0.385              | 100     | 0.003  | 0.001             | 0.028              |
| 32          | 100                | 0.083  | 0.040             | 0.305              | 100                | 0.043  | 0.019             | 0.100              | 92      | 0.001  | 0.000             | 0.006              |
| 34          | 69                 | 0.001  | <LOQ              | 0.003              | 23                 | <LOQ   | <LOQ              | 0.001              | 15      | <LOQ   | <LOQ              | 0.000              |
| 35          | 85                 | 0.004  | <LOQ              | 0.018              | 31                 | <LOQ   | <LOQ              | 0.005              | 15      | <LOQ   | <LOQ              | 0.000              |
| 36          | 0                  | <LOQ   | <LOQ              | <LOQ               | 8                  | <LOQ   | <LOQ              | 0.000              | 0       | <LOQ   | <LOQ              | <LOQ               |
| 37          | 100                | 0.045  | 0.020             | 0.187              | 100                | 0.017  | 0.008             | 0.041              | 38      | <LOQ   | <LOQ              | 0.003              |
| 38          | 38                 | <LOQ   | <LOQ              | 0.002              | 0                  | <LOQ   | <LOQ              | <LOQ               | 8       | <LOQ   | <LOQ              | 0.000              |
| 39          | 8                  | <LOQ   | <LOQ              | 0.007              | 0                  | <LOQ   | <LOQ              | <LOQ               | 0       | <LOQ   | <LOQ              | <LOQ               |
| 40+71       | 100                | 0.203  | 0.090             | 0.750              | 100                | 0.059  | 0.032             | 0.163              | 92      | 0.001  | 0.000             | 0.012              |
| 41          | 100                | 0.031  | 0.013             | 0.123              | 100                | 0.011  | 0.006             | 0.031              | 54      | 0.000  | <LOQ              | 0.002              |
| 42          | 100                | 0.135  | 0.059             | 0.475              | 100                | 0.038  | 0.022             | 0.103              | 92      | 0.001  | 0.000             | 0.008              |
| 43          | 100                | 0.029  | 0.013             | 0.097              | 92                 | 0.010  | 0.003             | 0.026              | 62      | 0.000  | <LOQ              | 0.002              |
| 44+47+65    | 100                | 1.204  | 0.492             | 4.071              | 100                | 0.302  | 0.167             | 0.896              | 92      | 0.005  | 0.001             | 0.057              |
| 45          | 100                | 0.097  | 0.035             | 0.328              | 100                | 0.032  | 0.015             | 0.087              | 100     | 0.001  | 0.000             | 0.005              |
| 46          | 100                | 0.031  | 0.013             | 0.113              | 100                | 0.011  | 0.006             | 0.029              | 85      | 0.000  | <LOQ              | 0.002              |
| 48          | 100                | 0.123  | 0.053             | 0.437              | 100                | 0.036  | 0.019             | 0.103              | 92      | 0.001  | 0.000             | 0.007              |
| 49+69       | 100                | 0.932  | 0.334             | 1.988              | 100                | 0.182  | 0.084             | 0.563              | 92      | 0.003  | 0.001             | 0.036              |
| 50+53       | 100                | 0.136  | 0.055             | 0.454              | 100                | 0.038  | 0.019             | 0.113              | 92      | 0.001  | 0.000             | 0.007              |
| 51          | 100                | 0.020  | 0.010             | 0.061              | 100                | 0.010  | 0.005             | 0.027              | 92      | 0.000  | 0.000             | 0.001              |
| 52          | 100                | 3.724  | 1.536             | 12.057             | 100                | 0.851  | 0.440             | 2.536              | 92      | 0.014  | 0.002             | 0.158              |
| 54          | 100                | 0.001  | 0.000             | 0.004              | 92                 | 0.000  | 0.000             | 0.001              | 46      | <LOQ   | <LOQ              | 0.000              |
| 55          | 38                 | <LOQ   | <LOQ              | 0.018              | 23                 | <LOQ   | <LOQ              | 0.005              | 8       | <LOQ   | <LOQ              | 0.000              |
| 56          | 100                | 0.130  | 0.058             | 0.496              | 100                | 0.033  | 0.020             | 0.091              | 54      | 0.001  | <LOQ              | 0.008              |
| 57          | 62                 | 0.001  | <LOQ              | 0.004              | 15                 | <LOQ   | <LOQ              | 0.002              | 8       | <LOQ   | <LOQ              | 0.000              |
| 58          | 15                 | <LOQ   | <LOQ              | 0.013              | 15                 | <LOQ   | <LOQ              | 0.003              | 0       | <LOQ   | <LOQ              | <LOQ               |
| 59+62+75    | 100                | 0.026  | 0.013             | 0.105              | 100                | 0.009  | 0.005             | 0.024              | 92      | 0.000  | 0.000             | 0.002              |
| 60          | 100                | 0.064  | 0.031             | 0.265              | 100                | 0.016  | 0.010             | 0.045              | 85      | 0.000  | <LOQ              | 0.004              |
| 61+70+74+76 | 100                | 1.571  | 0.707             | 5.842              | 100                | 0.364  | 0.216             | 1.026              | 92      | 0.004  | 0.001             | 0.080              |
| 63          | 100                | 0.016  | 0.008             | 0.067              | 100                | 0.004  | 0.002             | 0.013              | 46      | <LOQ   | <LOQ              | 0.001              |
| 64          | 100                | 0.386  | 0.168             | 1.411              | 100                | 0.095  | 0.054             | 0.274              | 92      | 0.001  | 0.000             | 0.020              |
| 66          | 100                | 0.354  | 0.169             | 1.422              | 100                | 0.085  | 0.051             | 0.247              | 92      | 0.001  | 0.000             | 0.021              |
| 67          | 100                | 0.007  | 0.003             | 0.028              | 92                 | 0.002  | 0.001             | 0.006              | 38      | <LOQ   | <LOQ              | 0.000              |
| 68          | 23                 | <LOQ   | <LOQ              | 0.002              | 46                 | <LOQ   | <LOQ              | 0.005              | 8       | <LOQ   | <LOQ              | 0.000              |
| 72          | 85                 | 0.002  | <LOQ              | 0.008              | 38                 | <LOQ   | <LOQ              | 0.001              | 8       | <LOQ   | <LOQ              | 0.000              |
| 73          | 8                  | <LOQ   | <LOQ              | 0.013              | 0                  | <LOQ   | <LOQ              | <LOQ               | 15      | <LOQ   | <LOQ              | 0.000              |
| 77          | 92                 | 0.020  | 0.004             | 0.079              | 62                 | 0.003  | <LOQ              | 0.010              | 38      | <LOQ   | <LOQ              | 0.002              |
| 78          | 0                  | <LOQ   | <LOQ              | <LOQ               | 0                  | <LOQ   | <LOQ              | <LOQ               | 0       | <LOQ   | <LOQ              | <LOQ               |



Table S13, continued

|               |     |       |       |       |     |       |       |       |    |       |       |       |
|---------------|-----|-------|-------|-------|-----|-------|-------|-------|----|-------|-------|-------|
| 79            | 77  | 0.006 | <LOQ  | 0.020 | 31  | <LOQ  | <LOQ  | 0.002 | 15 | <LOQ  | <LOQ  | 0.000 |
| 80            | 0   | <LOQ  | <LOQ  | <LOQ  | 0   | <LOQ  | <LOQ  | <LOQ  | 0  | <LOQ  | <LOQ  | <LOQ  |
| 81            | 0   | <LOQ  | <LOQ  | <LOQ  | 0   | <LOQ  | <LOQ  | <LOQ  | 0  | <LOQ  | <LOQ  | <LOQ  |
| 82            | 100 | 0.101 | 0.045 | 0.395 | 100 | 0.029 | 0.015 | 0.057 | 46 | <LOQ  | <LOQ  | 0.007 |
| 83            | 100 | 0.058 | 0.021 | 0.209 | 100 | 0.017 | 0.008 | 0.034 | 69 | 0.000 | <LOQ  | 0.003 |
| 84            | 100 | 0.522 | 0.209 | 1.945 | 100 | 0.156 | 0.066 | 0.338 | 92 | 0.002 | 0.000 | 0.025 |
| 85+116        | 100 | 0.142 | 0.063 | 0.570 | 100 | 0.039 | 0.017 | 0.087 | 92 | 0.001 | 0.000 | 0.007 |
| 86+97+109+119 | 100 | 0.359 | 0.159 | 1.557 | 100 | 0.107 | 0.045 | 0.221 | 92 | 0.002 | 0.000 | 0.019 |
| 87+125        | 100 | 0.622 | 0.266 | 2.270 | 100 | 0.170 | 0.077 | 0.358 | 92 | 0.003 | 0.000 | 0.033 |
| 88            | 0   | <LOQ  | <LOQ  | <LOQ  | 0   | <LOQ  | <LOQ  | <LOQ  | 0  | <LOQ  | <LOQ  | <LOQ  |
| 89            | 100 | 0.012 | 0.005 | 0.048 | 100 | 0.004 | 0.002 | 0.007 | 23 | <LOQ  | <LOQ  | 0.001 |
| 90+101+113    | 100 | 1.924 | 0.889 | 7.773 | 100 | 0.568 | 0.263 | 1.194 | 92 | 0.007 | 0.001 | 0.095 |
| 91            | 100 | 0.278 | 0.107 | 0.965 | 100 | 0.080 | 0.032 | 0.165 | 92 | 0.001 | 0.000 | 0.012 |
| 92            | 100 | 0.345 | 0.151 | 1.338 | 100 | 0.094 | 0.043 | 0.208 | 92 | 0.001 | 0.000 | 0.016 |
| 93+100        | 100 | 0.012 | 0.006 | 0.055 | 92  | 0.004 | 0.001 | 0.009 | 46 | <LOQ  | <LOQ  | 0.001 |
| 94            | 100 | 0.008 | 0.003 | 0.028 | 100 | 0.002 | 0.001 | 0.005 | 38 | <LOQ  | <LOQ  | 0.000 |
| 95            | 100 | 2.068 | 0.833 | 7.386 | 100 | 0.612 | 0.263 | 1.340 | 92 | 0.007 | 0.001 | 0.095 |
| 96            | 100 | 0.014 | 0.005 | 0.048 | 100 | 0.004 | 0.002 | 0.009 | 77 | 0.000 | <LOQ  | 0.001 |
| 98            | 8   | <LOQ  | <LOQ  | 0.001 | 8   | <LOQ  | <LOQ  | 0.000 | 8  | <LOQ  | <LOQ  | 0.000 |
| 99            | 100 | 0.685 | 0.331 | 2.881 | 100 | 0.189 | 0.089 | 0.426 | 92 | 0.002 | 0.000 | 0.032 |
| 102           | 100 | 0.054 | 0.020 | 0.190 | 100 | 0.017 | 0.007 | 0.033 | 77 | 0.000 | <LOQ  | 0.003 |
| 103           | 100 | 0.012 | 0.005 | 0.043 | 100 | 0.004 | 0.001 | 0.008 | 38 | <LOQ  | <LOQ  | 0.001 |
| 104           | 31  | <LOQ  | <LOQ  | 0.000 | 23  | <LOQ  | <LOQ  | 0.000 | 15 | <LOQ  | <LOQ  | 0.000 |
| 105           | 100 | 0.119 | 0.059 | 0.554 | 100 | 0.032 | 0.018 | 0.073 | 92 | 0.001 | 0.000 | 0.012 |
| 106           | 0   | <LOQ  | <LOQ  | <LOQ  | 0   | <LOQ  | <LOQ  | <LOQ  | 0  | <LOQ  | <LOQ  | <LOQ  |
| 107+124       | 100 | 0.024 | 0.012 | 0.114 | 100 | 0.008 | 0.004 | 0.014 | 54 | 0.000 | <LOQ  | 0.002 |
| 108           | 100 | 0.030 | 0.015 | 0.141 | 100 | 0.009 | 0.005 | 0.018 | 77 | 0.000 | <LOQ  | 0.003 |
| 110           | 100 | 1.273 | 0.563 | 5.269 | 100 | 0.364 | 0.178 | 0.775 | 92 | 0.007 | 0.001 | 0.077 |
| 111           | 0   | <LOQ  | <LOQ  | <LOQ  | 0   | <LOQ  | <LOQ  | <LOQ  | 0  | <LOQ  | <LOQ  | <LOQ  |
| 112           | 0   | <LOQ  | <LOQ  | <LOQ  | 0   | <LOQ  | <LOQ  | <LOQ  | 0  | <LOQ  | <LOQ  | <LOQ  |
| 114           | 100 | 0.012 | 0.006 | 0.054 | 85  | 0.003 | <LOQ  | 0.007 | 31 | <LOQ  | <LOQ  | 0.001 |
| 115           | 0   | <LOQ  | <LOQ  | <LOQ  | 15  | <LOQ  | <LOQ  | 0.009 | 0  | <LOQ  | <LOQ  | <LOQ  |
| 117           | 100 | 0.025 | 0.013 | 0.117 | 100 | 0.008 | 0.004 | 0.017 | 38 | <LOQ  | <LOQ  | 0.002 |
| 118           | 100 | 0.588 | 0.303 | 2.630 | 100 | 0.158 | 0.084 | 0.346 | 92 | 0.005 | 0.001 | 0.046 |
| 120           | 0   | <LOQ  | <LOQ  | <LOQ  | 0   | <LOQ  | <LOQ  | <LOQ  | 0  | <LOQ  | <LOQ  | <LOQ  |
| 121           | 8   | <LOQ  | <LOQ  | 0.001 | 0   | <LOQ  | <LOQ  | <LOQ  | 8  | <LOQ  | <LOQ  | 0.000 |
| 122           | 77  | 0.006 | <LOQ  | 0.018 | 15  | <LOQ  | <LOQ  | 0.004 | 23 | <LOQ  | <LOQ  | 0.001 |
| 123           | 100 | 0.010 | 0.005 | 0.041 | 69  | 0.002 | <LOQ  | 0.006 | 31 | <LOQ  | <LOQ  | 0.001 |
| 126           | 0   | <LOQ  | <LOQ  | <LOQ  | 0   | <LOQ  | <LOQ  | <LOQ  | 0  | <LOQ  | <LOQ  | <LOQ  |
| 127           | 0   | <LOQ  | <LOQ  | <LOQ  | 0   | <LOQ  | <LOQ  | <LOQ  | 0  | <LOQ  | <LOQ  | <LOQ  |
| 128+166       | 100 | 0.029 | 0.017 | 0.136 | 100 | 0.012 | 0.006 | 0.022 | 85 | 0.001 | <LOQ  | 0.007 |
| 129+138+163   | 100 | 0.311 | 0.179 | 1.546 | 100 | 0.123 | 0.069 | 0.284 | 92 | 0.007 | 0.001 | 0.053 |
| 130           | 100 | 0.020 | 0.011 | 0.161 | 100 | 0.007 | 0.004 | 0.015 | 77 | 0.000 | <LOQ  | 0.003 |
| 131           | 100 | 0.012 | 0.006 | 0.054 | 100 | 0.004 | 0.002 | 0.009 | 54 | 0.000 | <LOQ  | 0.001 |
| 132           | 100 | 0.174 | 0.093 | 0.761 | 100 | 0.066 | 0.036 | 0.140 | 92 | 0.003 | 0.000 | 0.021 |
| 133           | 100 | 0.006 | 0.002 | 0.025 | 100 | 0.002 | 0.001 | 0.005 | 46 | <LOQ  | <LOQ  | 0.001 |
| 134           | 100 | 0.044 | 0.026 | 0.215 | 100 | 0.017 | 0.009 | 0.041 | 77 | 0.001 | <LOQ  | 0.005 |
| 135+151       | 100 | 0.199 | 0.101 | 0.884 | 100 | 0.103 | 0.057 | 0.240 | 85 | 0.002 | <LOQ  | 0.018 |
| 136           | 100 | 0.129 | 0.058 | 0.513 | 100 | 0.055 | 0.028 | 0.112 | 92 | 0.001 | 0.000 | 0.009 |
| 137           | 100 | 0.023 | 0.012 | 0.118 | 100 | 0.007 | 0.004 | 0.017 | 77 | 0.000 | <LOQ  | 0.003 |
| 139+140       | 100 | 0.017 | 0.008 | 0.075 | 100 | 0.005 | 0.003 | 0.012 | 54 | 0.000 | <LOQ  | 0.001 |
| 141           | 100 | 0.059 | 0.032 | 0.646 | 100 | 0.028 | 0.016 | 0.072 | 85 | 0.001 | <LOQ  | 0.009 |
| 142           | 8   | <LOQ  | <LOQ  | 0.000 | 0   | <LOQ  | <LOQ  | <LOQ  | 0  | <LOQ  | <LOQ  | <LOQ  |
| 143           | 15  | <LOQ  | <LOQ  | 0.003 | 8   | <LOQ  | <LOQ  | 0.001 | 8  | <LOQ  | <LOQ  | 0.000 |
| 144           | 100 | 0.034 | 0.017 | 0.156 | 100 | 0.016 | 0.009 | 0.036 | 77 | 0.000 | <LOQ  | 0.003 |
| 145           | 92  | 0.001 | 0.000 | 0.003 | 62  | 0.000 | <LOQ  | 0.001 | 8  | <LOQ  | <LOQ  | 0.000 |
| 146           | 92  | 0.044 | 0.014 | 0.224 | 100 | 0.021 | 0.012 | 0.048 | 85 | 0.001 | <LOQ  | 0.006 |
| 147+149       | 100 | 0.505 | 0.253 | 2.192 | 100 | 0.224 | 0.124 | 0.518 | 92 | 0.005 | 0.001 | 0.047 |
| 148           | 77  | 0.000 | <LOQ  | 0.002 | 69  | 0.000 | <LOQ  | 0.000 | 0  | <LOQ  | <LOQ  | <LOQ  |
| 150           | 100 | 0.002 | 0.001 | 0.007 | 92  | 0.001 | 0.000 | 0.002 | 15 | <LOQ  | <LOQ  | 0.000 |
| 152           | 100 | 0.001 | 0.001 | 0.006 | 92  | 0.001 | 0.000 | 0.001 | 8  | <LOQ  | <LOQ  | 0.000 |
| 153+168       | 92  | 0.314 | 0.097 | 1.469 | 100 | 0.150 | 0.083 | 0.372 | 92 | 0.004 | 0.001 | 0.039 |
| 154           | 100 | 0.007 | 0.003 | 0.032 | 100 | 0.004 | 0.002 | 0.009 | 54 | 0.000 | <LOQ  | 0.001 |
| 155           | 77  | 0.000 | <LOQ  | 0.000 | 77  | 0.000 | <LOQ  | 0.000 | 0  | <LOQ  | <LOQ  | <LOQ  |
| 156+157       | 100 | 0.018 | 0.009 | 0.064 | 100 | 0.005 | 0.002 | 0.010 | 92 | 0.000 | 0.000 | 0.003 |
| 158           | 100 | 0.031 | 0.019 | 0.154 | 100 | 0.012 | 0.007 | 0.025 | 92 | 0.001 | 0.000 | 0.005 |
| 159           | 8   | <LOQ  | <LOQ  | 0.001 | 38  | <LOQ  | <LOQ  | 0.001 | 0  | <LOQ  | <LOQ  | <LOQ  |
| 160           | 8   | <LOQ  | <LOQ  | 0.001 | 8   | <LOQ  | <LOQ  | 0.000 | 15 | <LOQ  | <LOQ  | 0.000 |

Table S13, continued

|         |     |       |       |       |     |       |       |       |    |       |       |       |
|---------|-----|-------|-------|-------|-----|-------|-------|-------|----|-------|-------|-------|
| 161     | 15  | <LOQ  | <LOQ  | 0.040 | 0   | <LOQ  | <LOQ  | <LOQ  | 0  | <LOQ  | <LOQ  | <LOQ  |
| 162     | 23  | <LOQ  | <LOQ  | 0.002 | 0   | <LOQ  | <LOQ  | <LOQ  | 15 | <LOQ  | <LOQ  | 0.000 |
| 164     | 100 | 0.014 | 0.008 | 0.084 | 100 | 0.006 | 0.004 | 0.014 | 77 | 0.000 | <LOQ  | 0.003 |
| 165     | 8   | <LOQ  | <LOQ  | 0.000 | 8   | <LOQ  | <LOQ  | 0.000 | 0  | <LOQ  | <LOQ  | <LOQ  |
| 167     | 100 | 0.005 | 0.003 | 0.027 | 92  | 0.002 | 0.001 | 0.004 | 62 | 0.000 | <LOQ  | 0.001 |
| 169     | 0   | <LOQ  | <LOQ  | <LOQ  | 0   | <LOQ  | <LOQ  | <LOQ  | 0  | <LOQ  | <LOQ  | <LOQ  |
| 170     | 100 | 0.008 | 0.004 | 0.024 | 100 | 0.007 | 0.004 | 0.017 | 85 | 0.000 | <LOQ  | 0.002 |
| 171+173 | 100 | 0.006 | 0.003 | 0.025 | 100 | 0.007 | 0.003 | 0.015 | 62 | 0.000 | <LOQ  | 0.001 |
| 172     | 92  | 0.002 | 0.001 | 0.005 | 100 | 0.003 | 0.002 | 0.007 | 38 | <LOQ  | <LOQ  | 0.001 |
| 174     | 100 | 0.017 | 0.009 | 0.059 | 100 | 0.025 | 0.011 | 0.057 | 92 | 0.000 | 0.000 | 0.003 |
| 175     | 100 | 0.002 | 0.001 | 0.006 | 100 | 0.002 | 0.001 | 0.005 | 31 | <LOQ  | <LOQ  | 0.000 |
| 176     | 100 | 0.007 | 0.004 | 0.025 | 100 | 0.009 | 0.004 | 0.019 | 54 | 0.000 | <LOQ  | 0.001 |
| 177     | 100 | 0.011 | 0.006 | 0.039 | 100 | 0.016 | 0.007 | 0.034 | 54 | 0.000 | <LOQ  | 0.002 |
| 178     | 100 | 0.006 | 0.003 | 0.022 | 100 | 0.010 | 0.004 | 0.024 | 54 | 0.000 | <LOQ  | 0.001 |
| 179     | 100 | 0.026 | 0.012 | 0.095 | 100 | 0.033 | 0.015 | 0.078 | 85 | 0.000 | <LOQ  | 0.003 |
| 180+193 | 100 | 0.026 | 0.012 | 0.092 | 100 | 0.040 | 0.017 | 0.088 | 85 | 0.001 | <LOQ  | 0.004 |
| 181     | 62  | 0.001 | <LOQ  | 0.002 | 0   | <LOQ  | <LOQ  | <LOQ  | 8  | <LOQ  | <LOQ  | 0.000 |
| 182     | 46  | <LOQ  | <LOQ  | 0.001 | 85  | 0.001 | <LOQ  | 0.002 | 0  | <LOQ  | <LOQ  | <LOQ  |
| 183     | 100 | 0.018 | 0.010 | 0.071 | 100 | 0.025 | 0.012 | 0.059 | 92 | 0.000 | 0.000 | 0.002 |
| 184     | 31  | <LOQ  | <LOQ  | 0.000 | 69  | 0.000 | <LOQ  | 0.001 | 0  | <LOQ  | <LOQ  | <LOQ  |
| 185     | 92  | 0.004 | 0.001 | 0.007 | 100 | 0.006 | 0.002 | 0.012 | 46 | <LOQ  | <LOQ  | 0.001 |
| 186     | 0   | <LOQ  | <LOQ  | <LOQ  | 0   | <LOQ  | <LOQ  | <LOQ  | 0  | <LOQ  | <LOQ  | <LOQ  |
| 187     | 100 | 0.039 | 0.021 | 0.157 | 100 | 0.064 | 0.028 | 0.148 | 85 | 0.001 | <LOQ  | 0.005 |
| 188     | 54  | 0.000 | <LOQ  | 0.001 | 77  | 0.001 | <LOQ  | 0.001 | 0  | <LOQ  | <LOQ  | <LOQ  |
| 189     | 0   | <LOQ  | <LOQ  | <LOQ  | 0   | <LOQ  | <LOQ  | <LOQ  | 0  | <LOQ  | <LOQ  | <LOQ  |
| 190     | 100 | 0.001 | 0.001 | 0.009 | 92  | 0.002 | 0.001 | 0.005 | 38 | <LOQ  | <LOQ  | 0.001 |
| 191     | 62  | 0.000 | <LOQ  | 0.001 | 54  | 0.000 | <LOQ  | 0.001 | 23 | <LOQ  | <LOQ  | 0.000 |
| 192     | 0   | <LOQ  | <LOQ  | <LOQ  | 0   | <LOQ  | <LOQ  | <LOQ  | 0  | <LOQ  | <LOQ  | <LOQ  |
| 194     | 69  | 0.002 | <LOQ  | 0.018 | 77  | 0.003 | <LOQ  | 0.007 | 23 | <LOQ  | <LOQ  | 0.000 |
| 195     | 77  | 0.001 | <LOQ  | 0.004 | 92  | 0.002 | 0.001 | 0.005 | 8  | <LOQ  | <LOQ  | 0.000 |
| 196     | 100 | 0.003 | 0.001 | 0.012 | 100 | 0.005 | 0.003 | 0.011 | 38 | <LOQ  | <LOQ  | 0.000 |
| 197     | 38  | <LOQ  | <LOQ  | 0.003 | 46  | <LOQ  | <LOQ  | 0.004 | 0  | <LOQ  | <LOQ  | <LOQ  |
| 198+199 | 100 | 0.007 | 0.003 | 0.030 | 100 | 0.011 | 0.005 | 0.024 | 46 | <LOQ  | <LOQ  | 0.001 |
| 200     | 92  | 0.002 | 0.001 | 0.007 | 100 | 0.003 | 0.001 | 0.007 | 8  | <LOQ  | <LOQ  | 0.000 |
| 201     | 100 | 0.002 | 0.001 | 0.010 | 100 | 0.004 | 0.002 | 0.010 | 38 | <LOQ  | <LOQ  | 0.000 |
| 202     | 100 | 0.005 | 0.003 | 0.021 | 100 | 0.007 | 0.004 | 0.016 | 54 | 0.000 | <LOQ  | 0.000 |
| 203     | 100 | 0.005 | 0.002 | 0.022 | 100 | 0.007 | 0.003 | 0.015 | 54 | 0.000 | <LOQ  | 0.001 |
| 205     | 8   | <LOQ  | <LOQ  | 0.000 | 0   | <LOQ  | <LOQ  | <LOQ  | 0  | <LOQ  | <LOQ  | <LOQ  |
| 206     | 54  | 0.001 | <LOQ  | 0.020 | 54  | 0.002 | <LOQ  | 0.003 | 0  | <LOQ  | <LOQ  | <LOQ  |
| 207     | 31  | <LOQ  | <LOQ  | 0.001 | 77  | 0.001 | <LOQ  | 0.002 | 0  | <LOQ  | <LOQ  | <LOQ  |
| 208     | 92  | 0.001 | 0.000 | 0.005 | 92  | 0.001 | 0.000 | 0.003 | 38 | <LOQ  | <LOQ  | 0.000 |
| 209     | 8   | <LOQ  | <LOQ  | 0.004 | 0   | <LOQ  | <LOQ  | <LOQ  | 0  | <LOQ  | <LOQ  | <LOQ  |
